# Supplementary material for: Analysis of muntjac deer genome and chromatin architecture reveals rapid karyotype evolution
Source: PubMed Central journal article supplement (PMC7463020; doi:10.1038/s42003-020-1096-9), 2020-09-01
Supplement: 42003_2020_1096_MOESM1_ESM.pdf [file 42003_2020_1096_MOESM1_ESM.pdf]

## Description of Additional Supplementary Files

### File Name: Supplementary Data 1

**Description:** Candidate positively selected genes. List of one-to-one gene orthologs between the two muntjac species with Yang-Nielsen<sup>17</sup> dN/dS values of 1.5 or more. Putative gene names were extracted from the BLAST+ (v2.6.0)<sup>18</sup> best hit to the *H. sapiens* proteome from UniProt<sup>19</sup>. For cases where the best hit disagreed between *M. muntjak* and *M. reevesi*, both hits were noted.
