# Supplementary material for: Analysis of muntjac deer genome and chromatin architecture reveals rapid karyotype evolution
Source: PubMed Central journal article supplement (PMC7463020; doi:10.1038/s42003-020-1096-9), 2020-09-01
Supplement: 42003_2020_1096_MOESM2_ESM.pdf [file 42003_2020_1096_MOESM2_ESM.pdf]

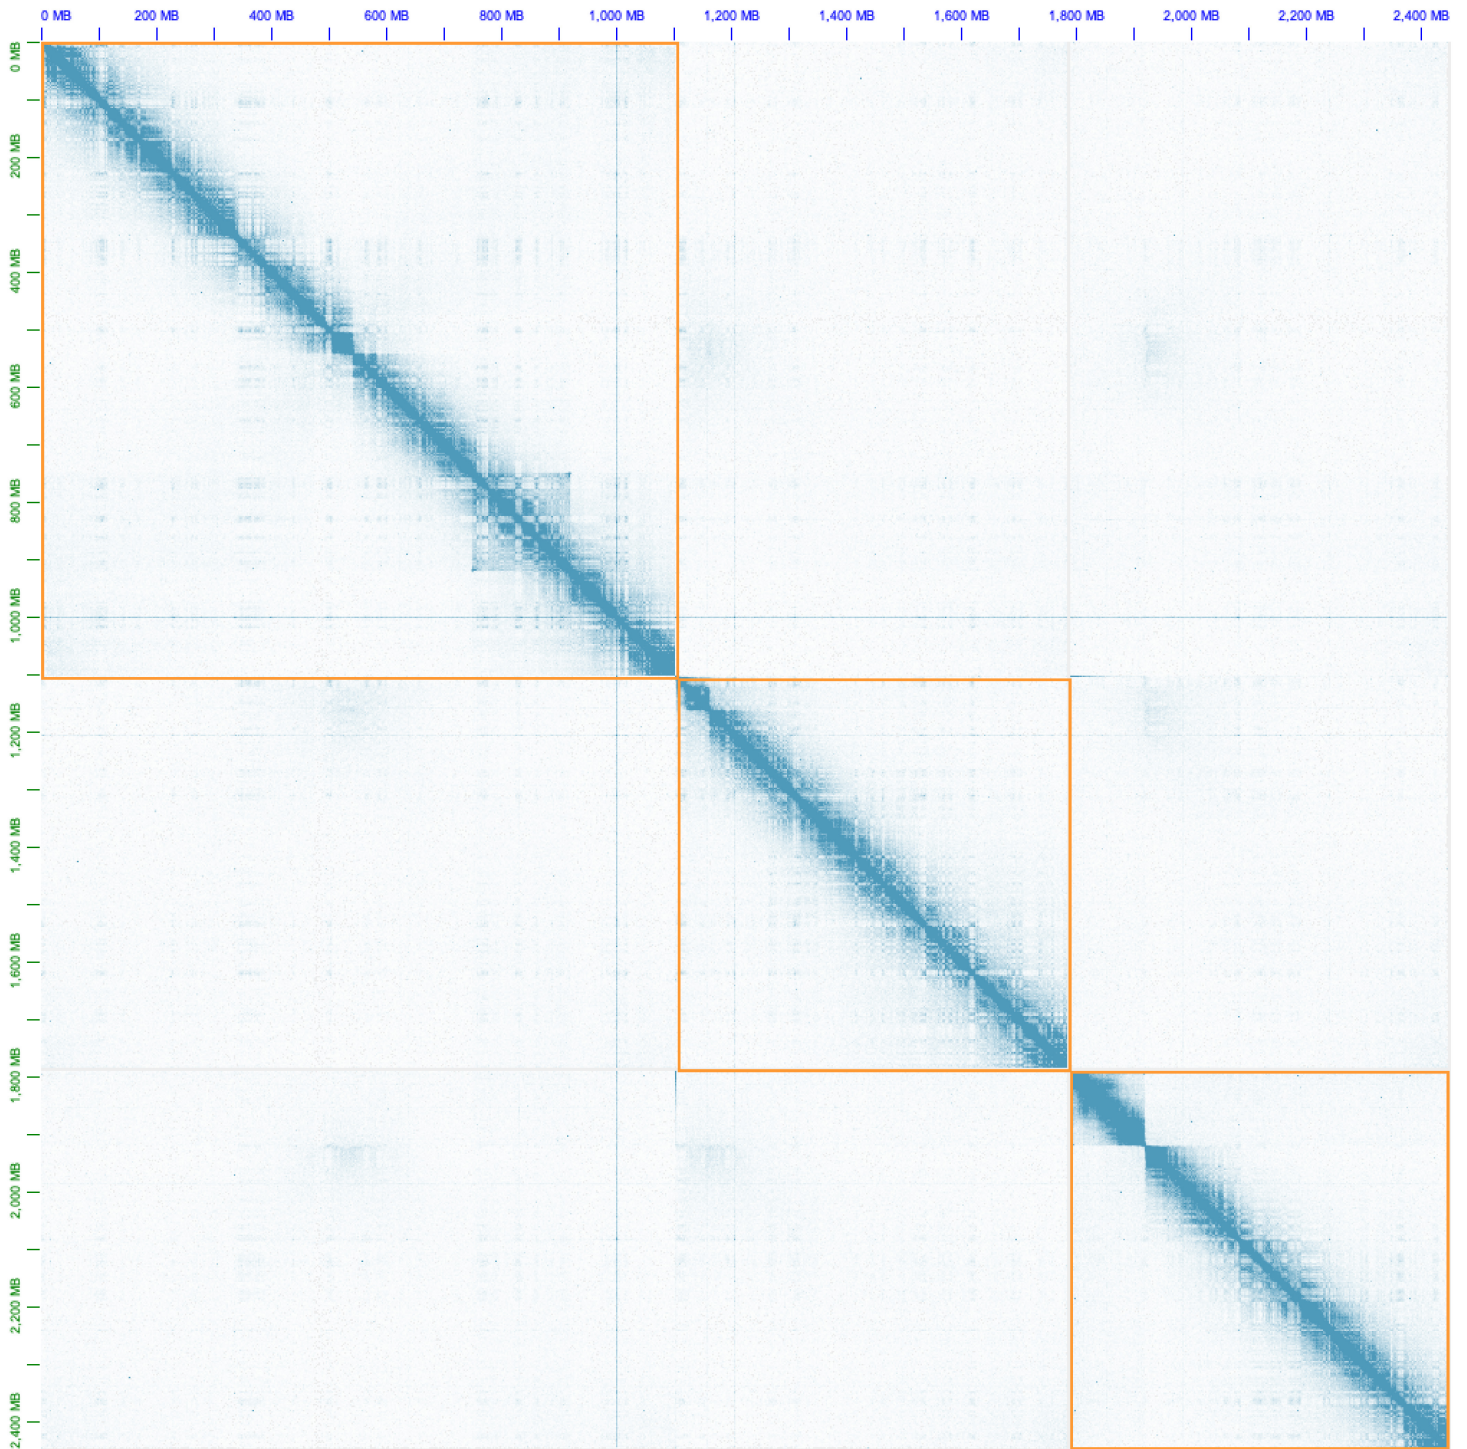

**Supplementary Figure 1. Genome-wide Hi-C contact map of *M. muntjak*.** *M. muntjak* Hi-C data mapped to the *M. muntjak* assembly (x and y axes). The three *M. muntjak* chromosomes are outlined in orange and are shown in ascending order (from upper-left to lower-right). The intensity of blue pixels is proportional to the contact frequency between x-y pairs of genomic loci. The highest intensity pixels are along the diagonal of each chromosome, indicating a high degree of contacts between loci in close proximity. The checkerboard/striped patterns within chromosomes reflect reduced contact frequency between neighboring loci and increased contacts between more distant loci due to the three-dimensional chromatin folding (i.e., A/B compartment) structure within the nucleus.

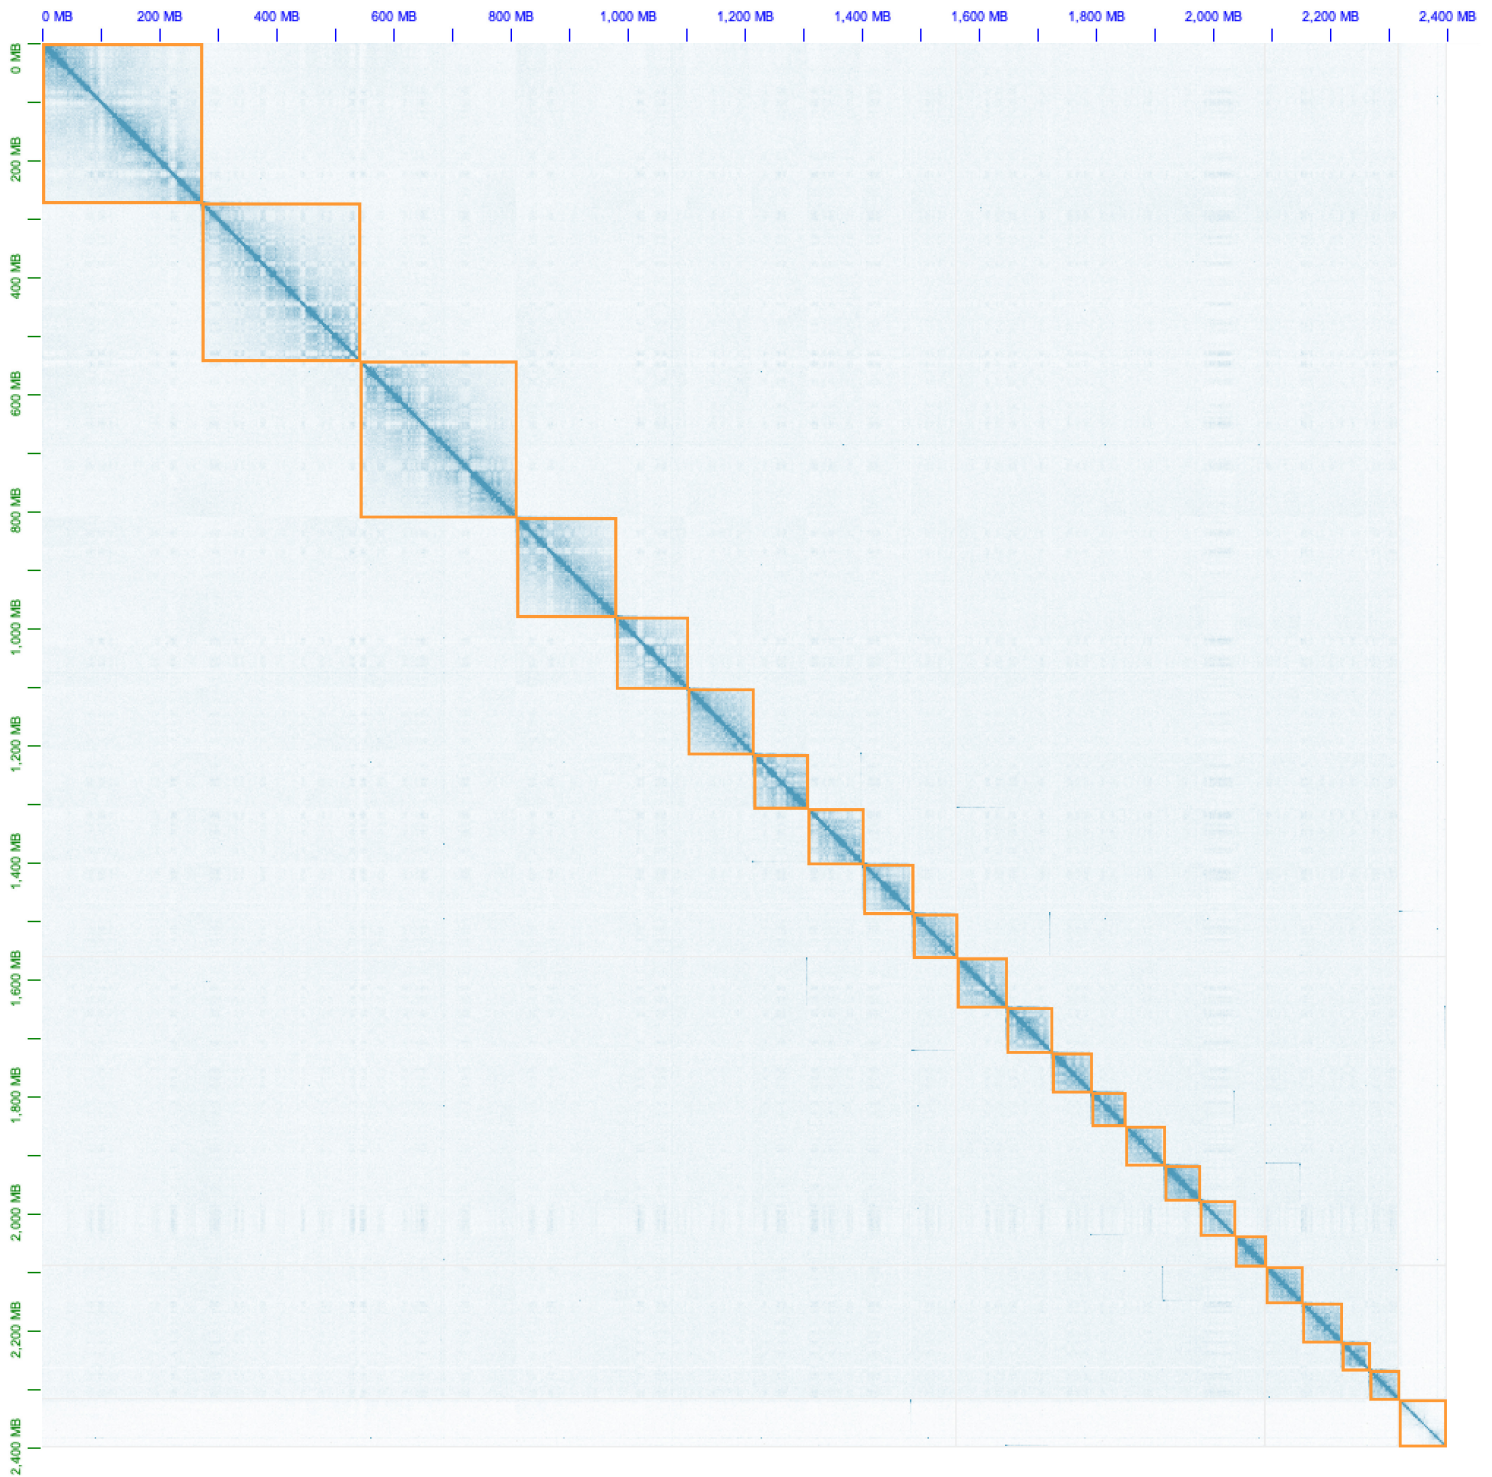

**Supplementary Figure 2. Genome-wide Hi-C contact map of *M. reevesi*.** *M. reevesi* Hi-C data mapped to the *M. reevesi* assembly (x and y axes). The 23 *M. reevesi* chromosomes are outlined in orange and are shown in ascending order (from upper-left to lower-right). The intensity of blue pixels is proportional to the contact frequency between x-y pairs of genomic loci. The highest intensity pixels are along the diagonal of each chromosome, indicating a high degree of contacts between loci in close proximity. The checkerboard/striped patterns within chromosomes reflect reduced contact frequency between neighboring loci and increased contacts between more distant loci due to the three-dimensional chromatin folding (i.e., A/B compartment) structure within the nucleus.

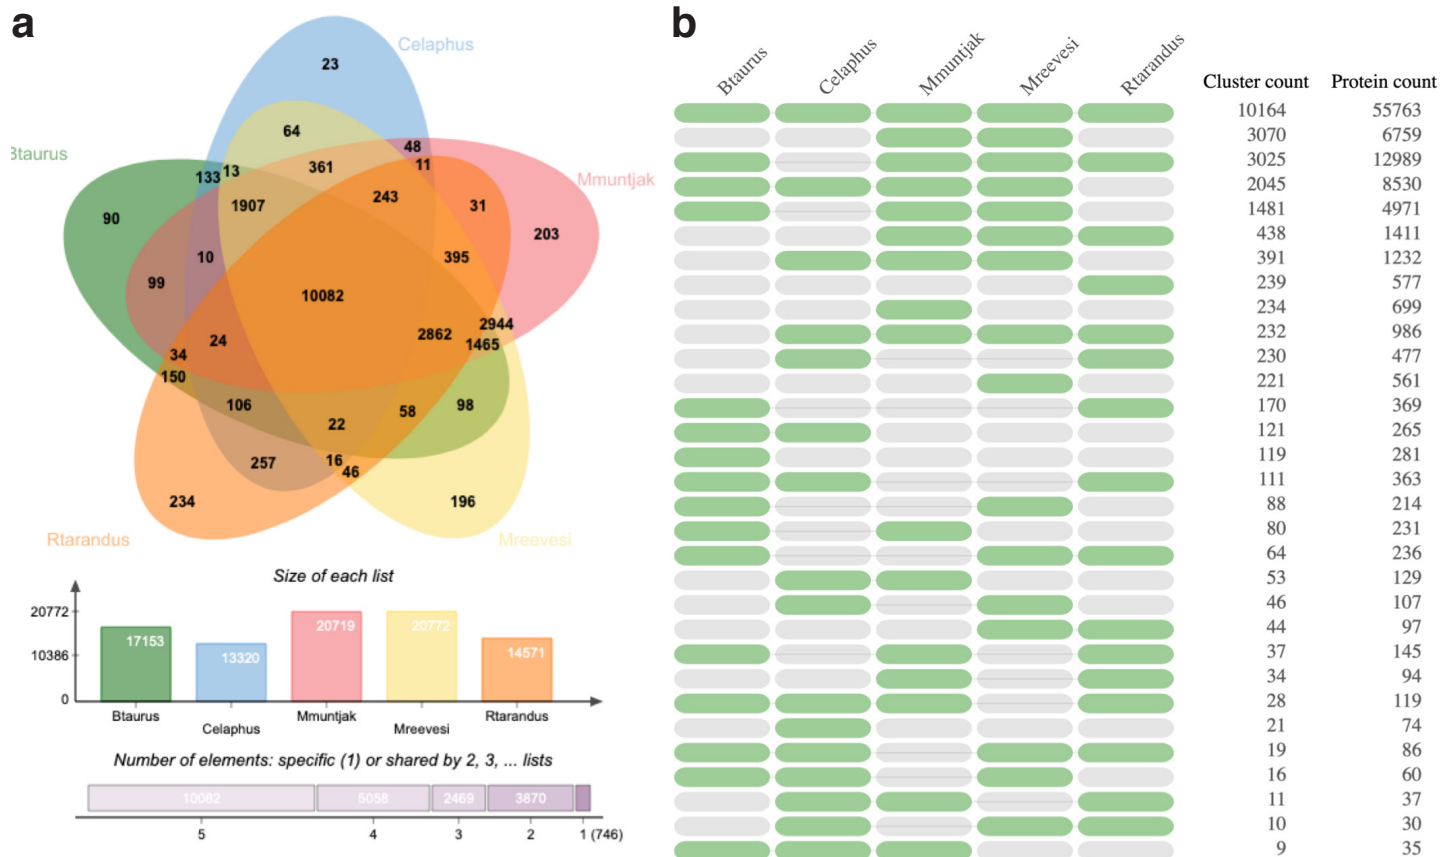

**Supplementary Figure 3. Quantification of orthologous protein-coding genes in four cervid species and cow.** (a) Venn diagram of gene homology between the two muntjac annotations, *B. taurus* (Ensembl release 94 September 2011 genebuild of GCA\_000003055.3)<sup>1,2</sup>, *C. elaphus* (publication genebuild of GCA\_002197005.1)<sup>3</sup>, and *R. tarandus*<sup>4,5</sup> annotations analyzed with OrthoVenn<sup>6</sup> and (b) the occurrence table of gene homology clusters between these species reanalyzed with OrthoVenn2<sup>7</sup> for visualization purposes. In the occurrence table, the green and grey ovals represent the presence or absence, respectively, of that species in the OrthoVenn2 clustering. The number of clusters and proteins were provided for all species combinations.

**a**

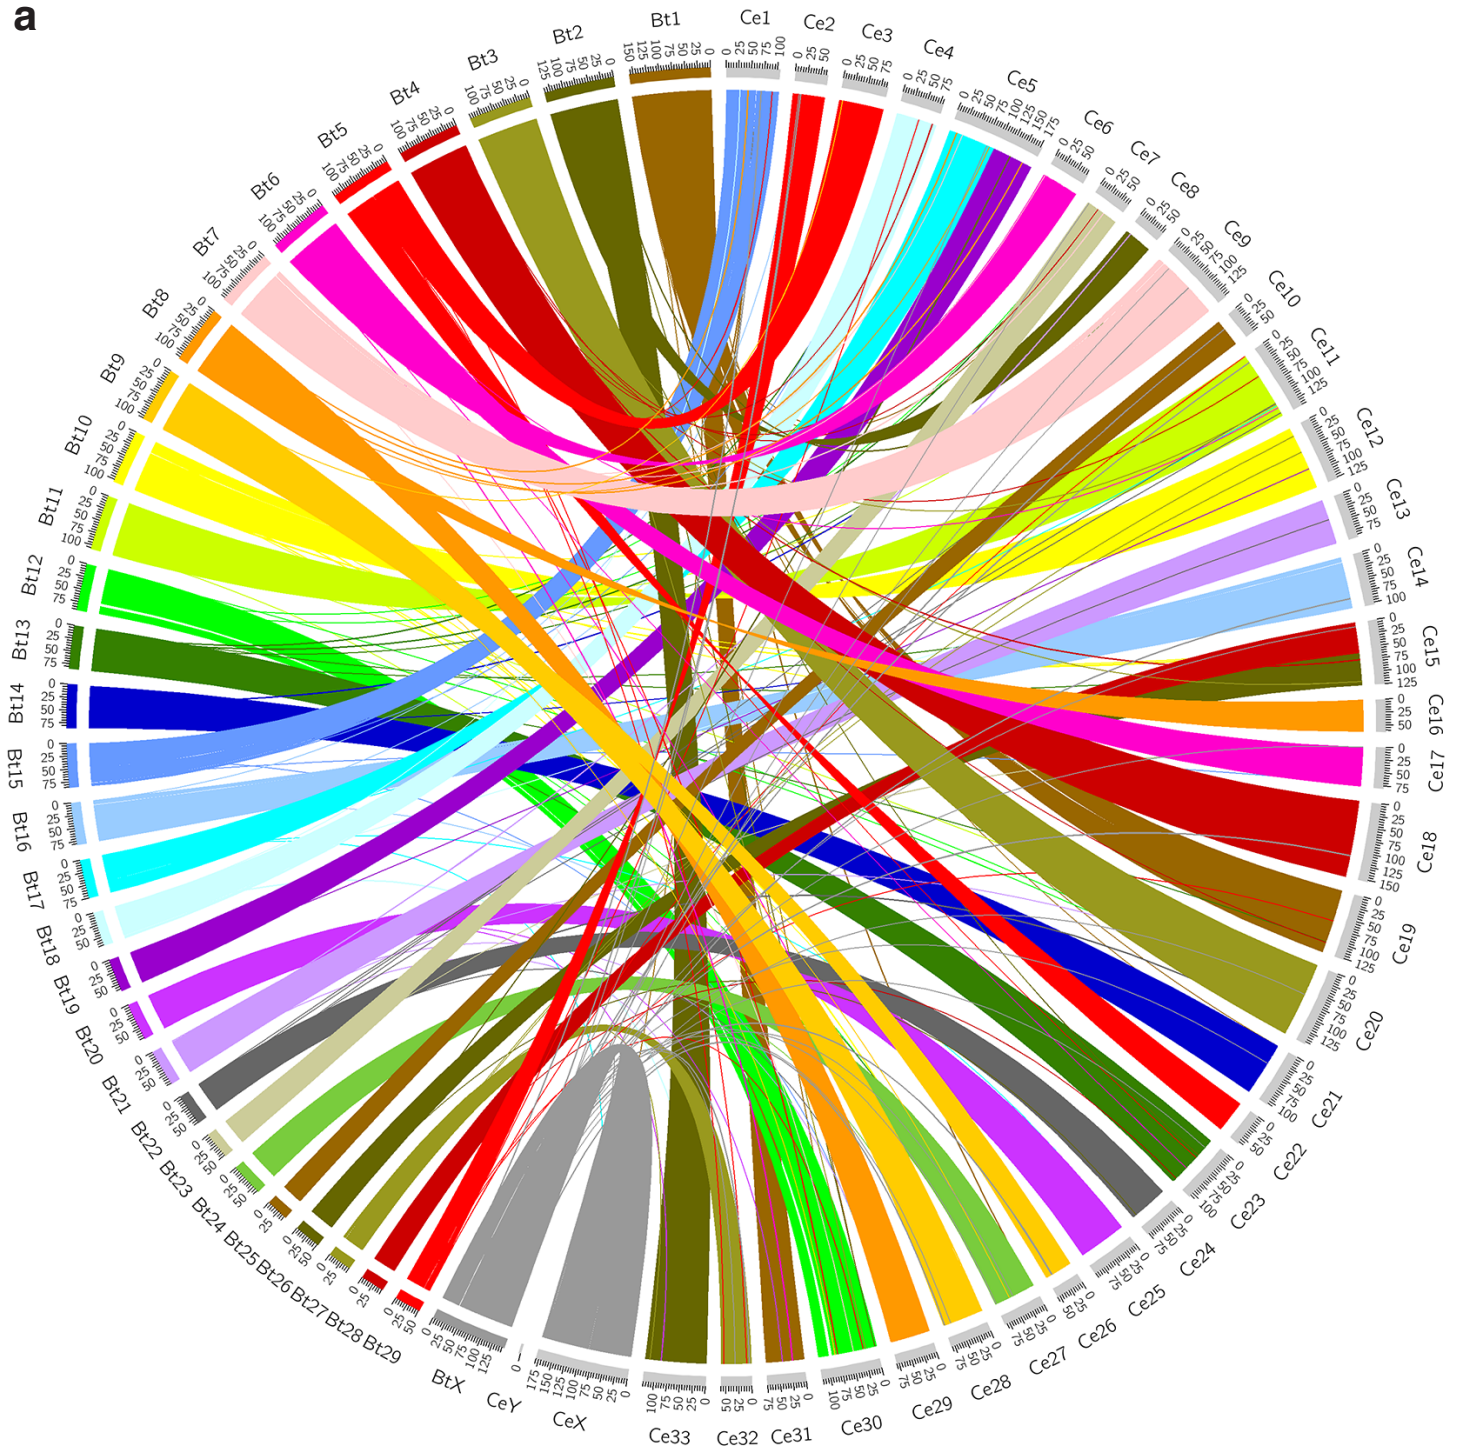

**b**

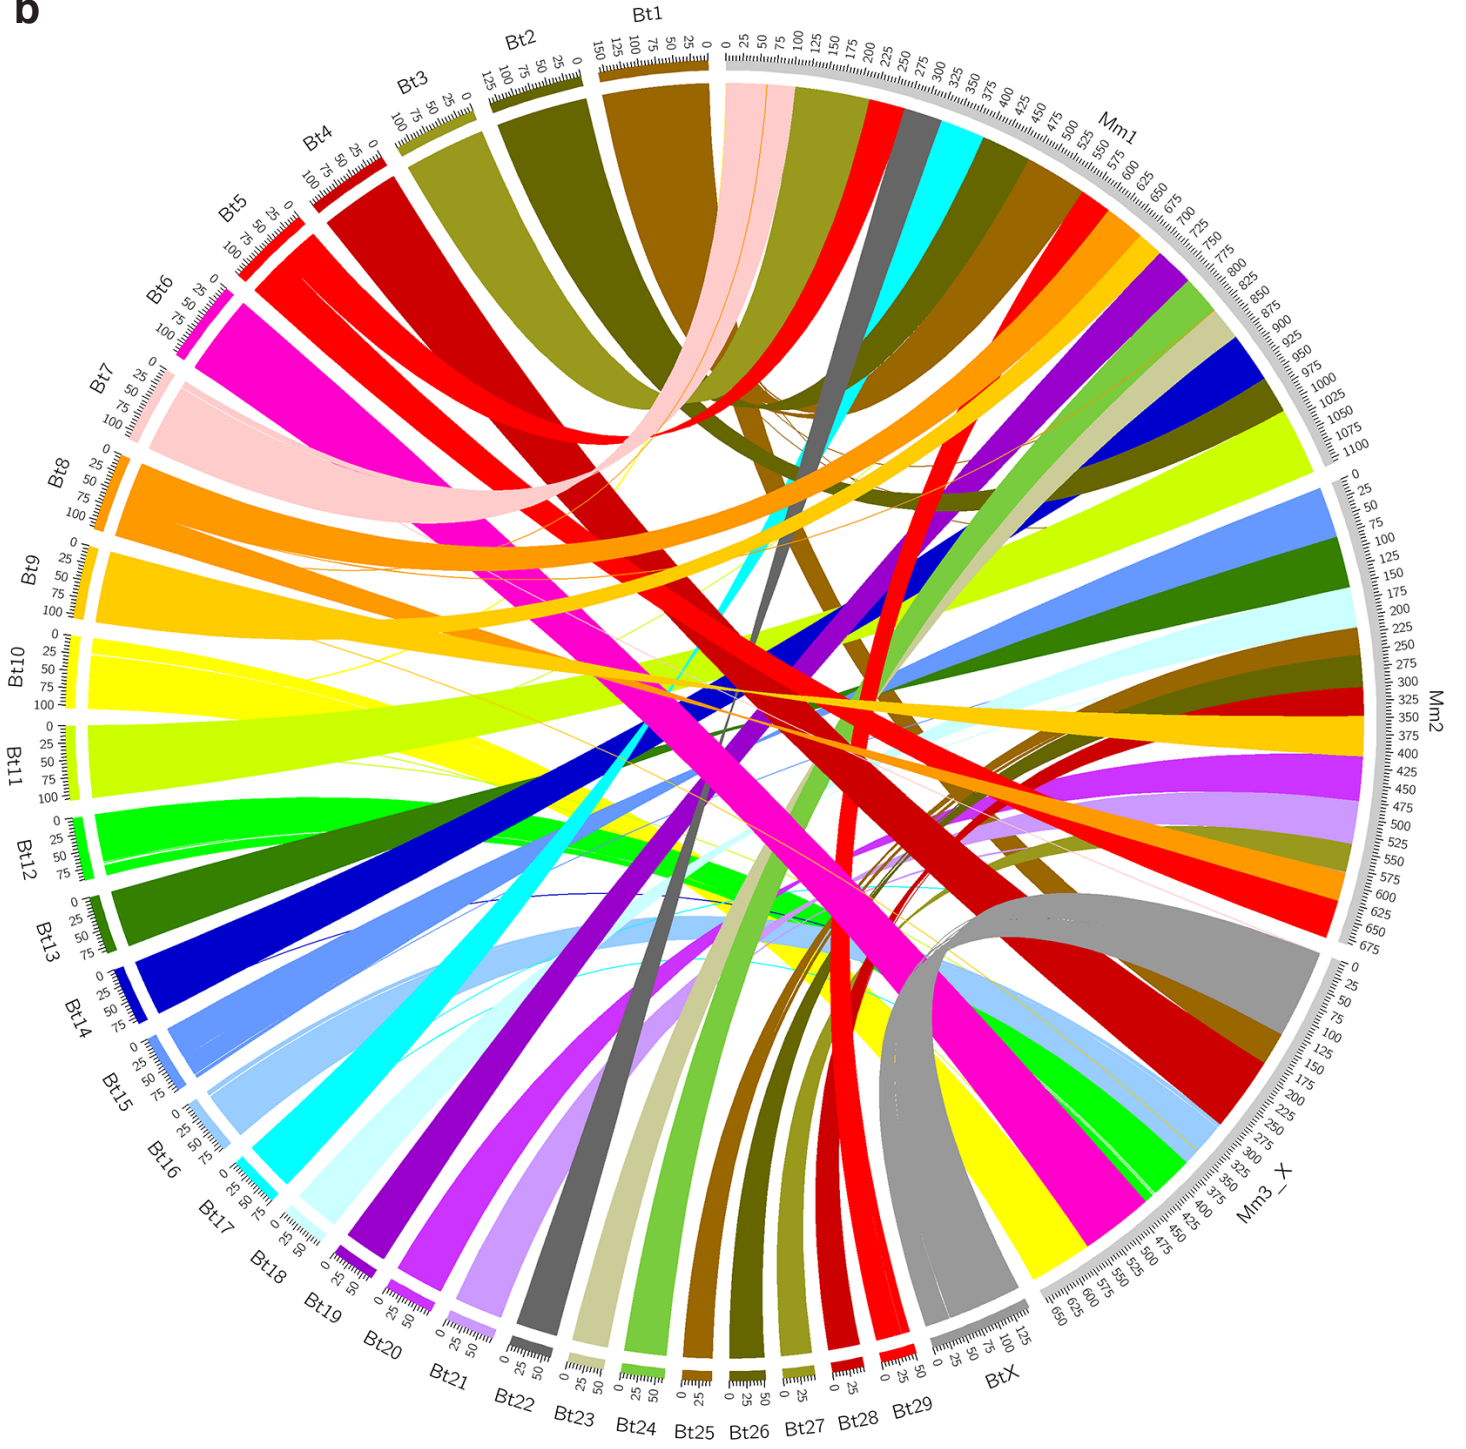

C

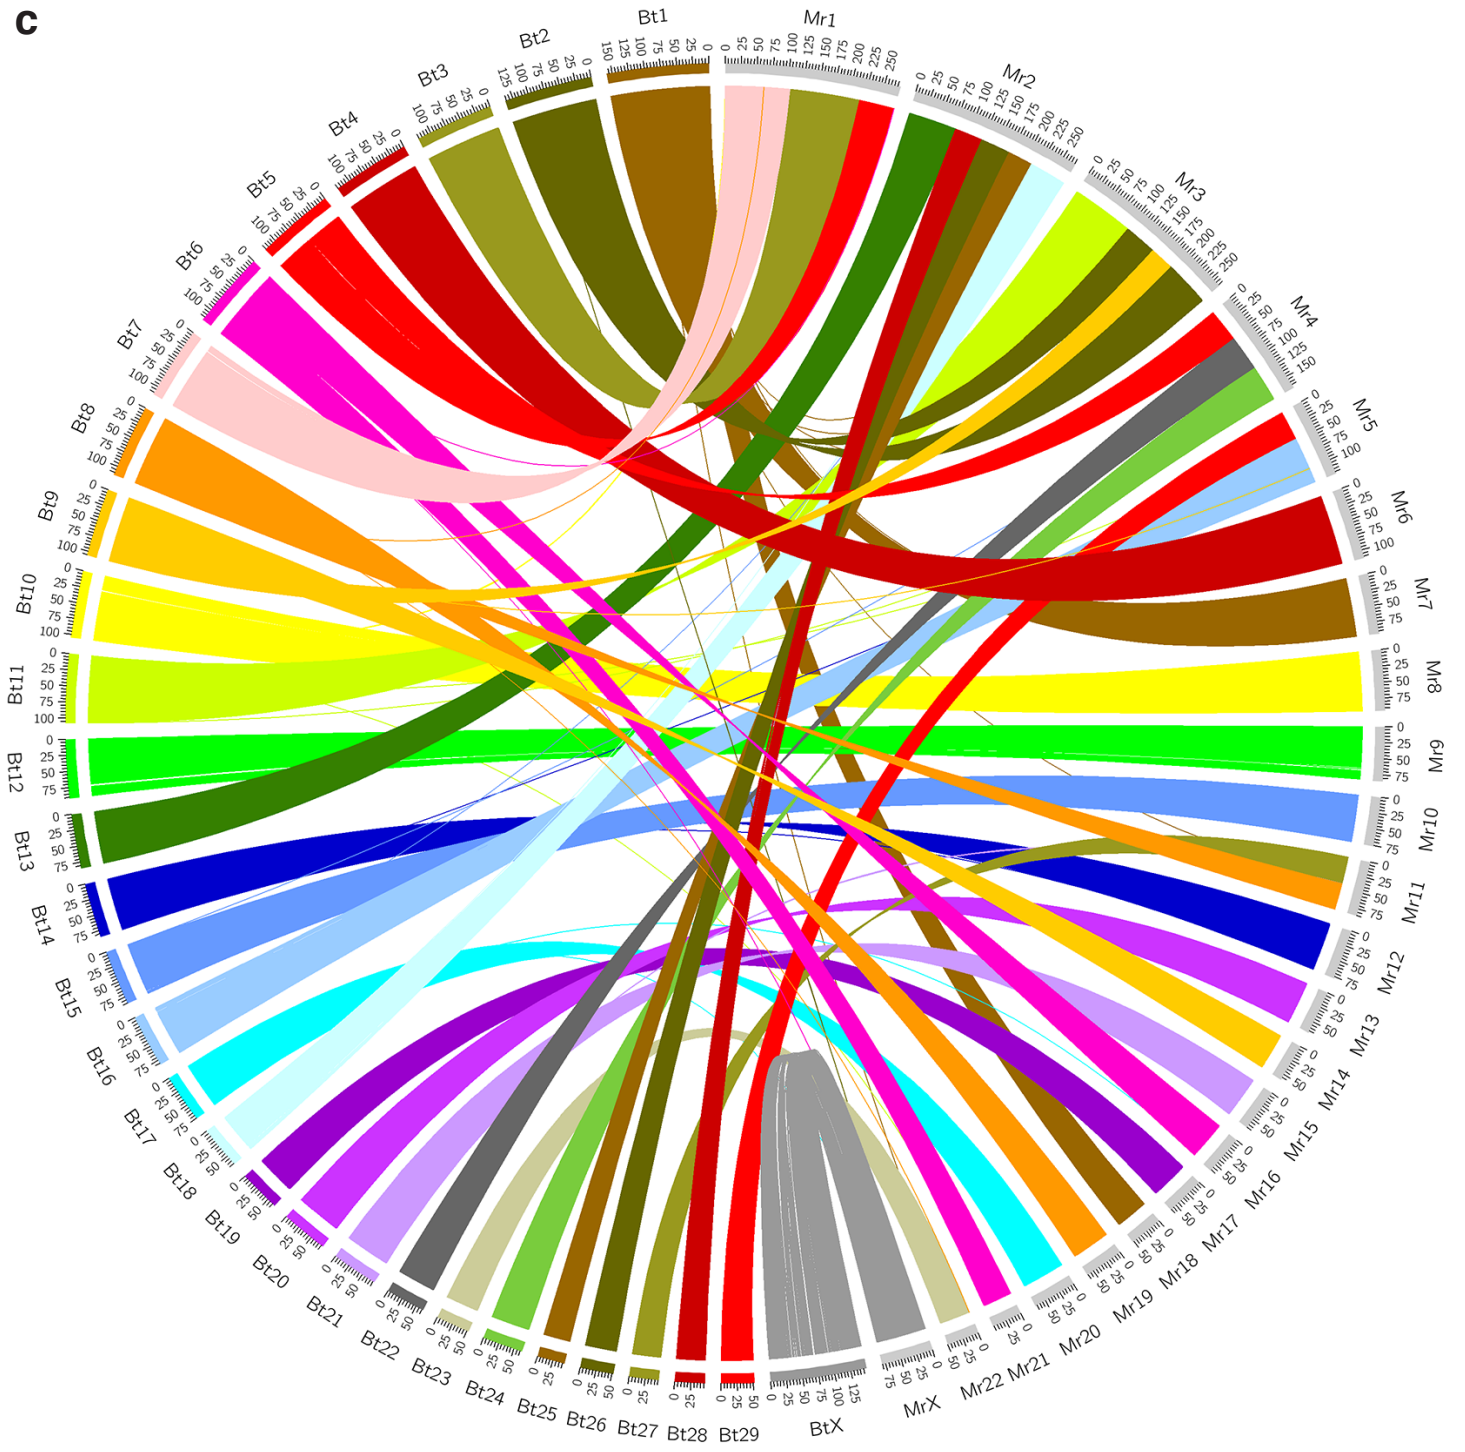

d

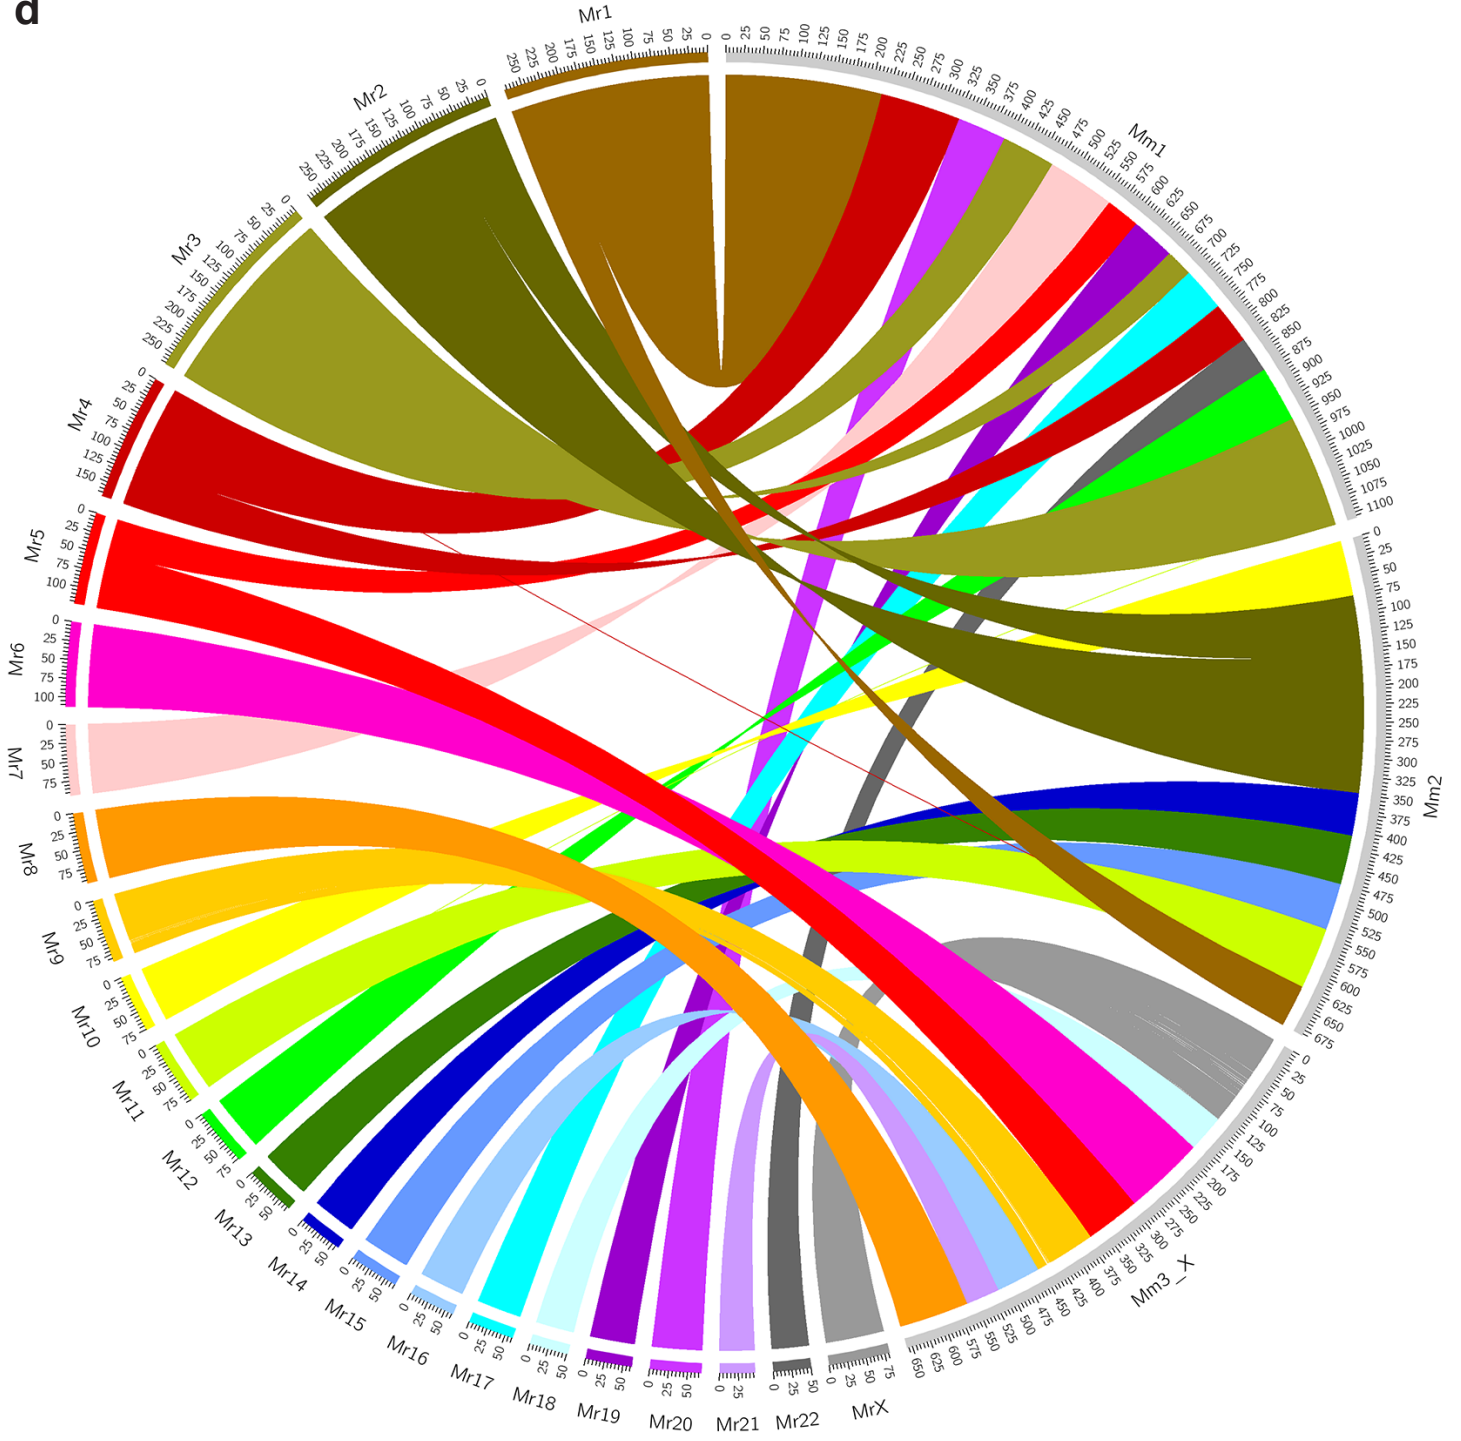

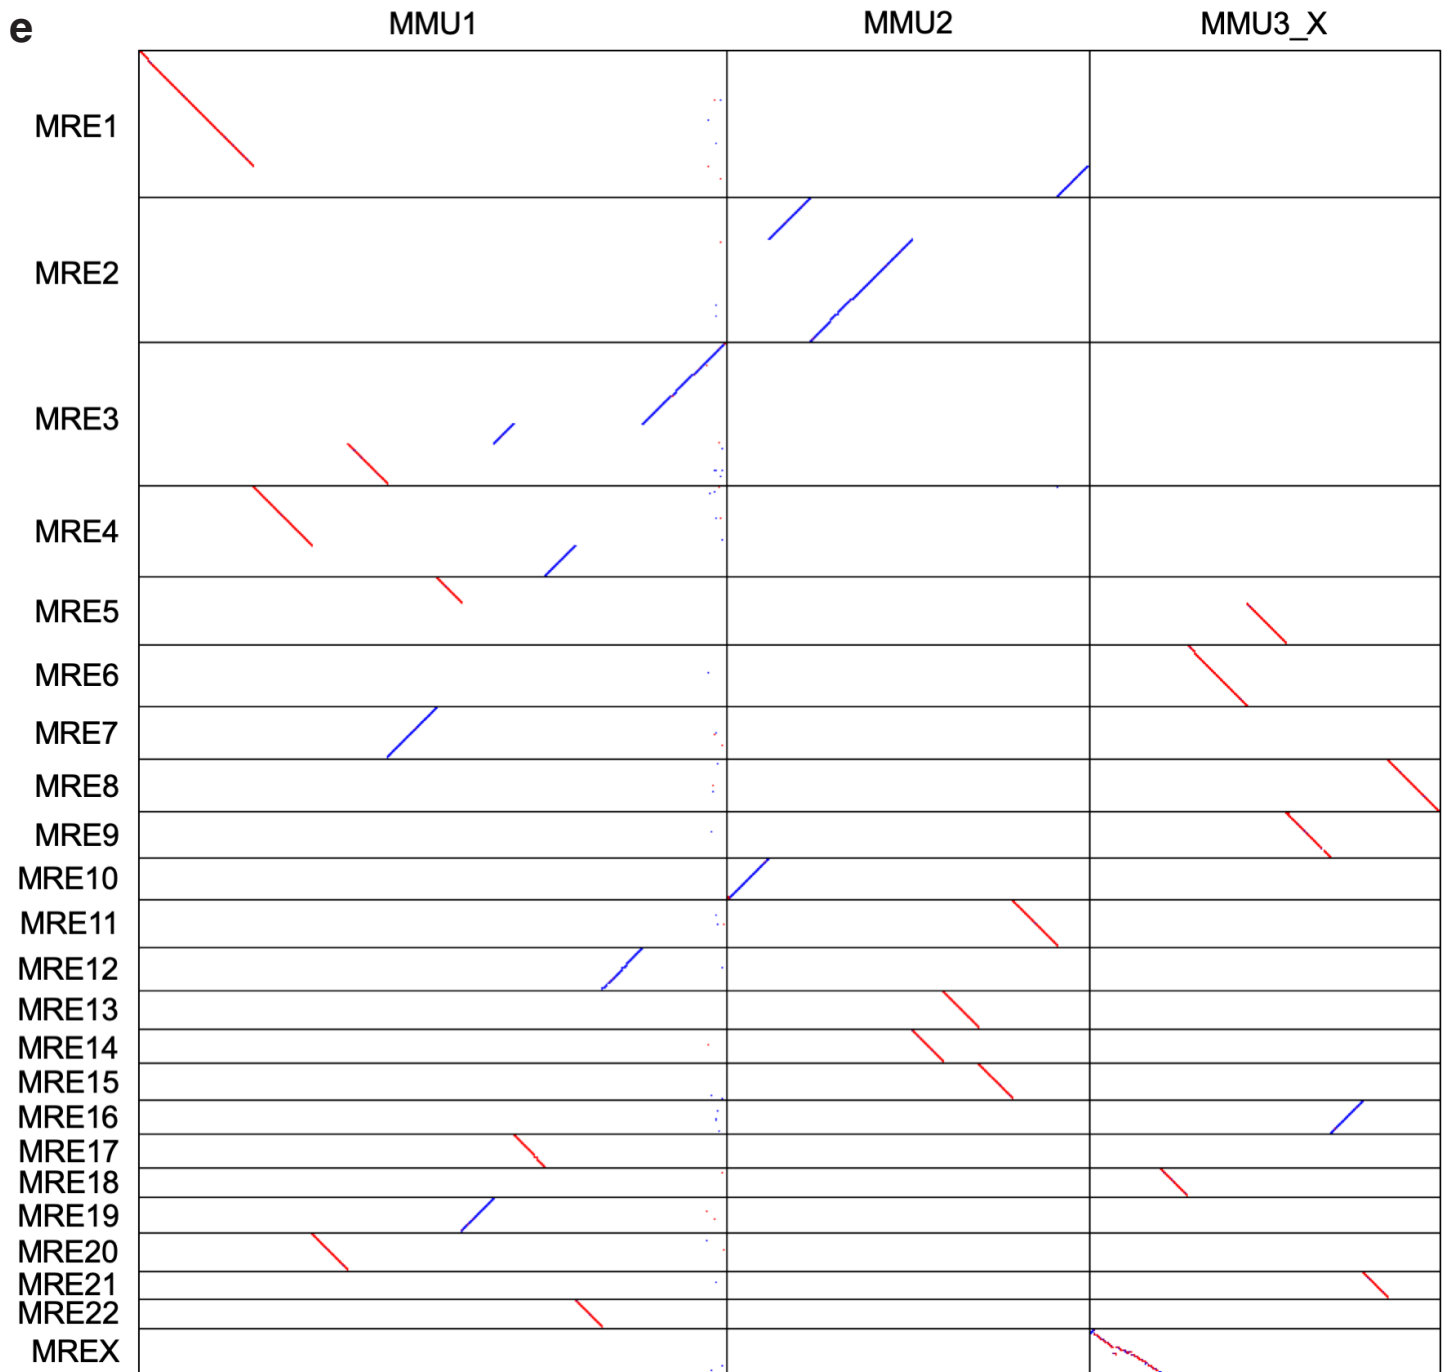

**Supplementary Figure 4. Pair-wise comparisons between cow and cervid chromosome-scale assemblies.** **a–d** Circos (v0.69-6)<sup>8</sup> plots with runs of collinearity containing at least 25 kb of aligned sequence between **a** *B. taurus* (left, Bt) and *C. elaphus* (right, Ce), **b** *B. taurus* (left, Bt) and *M. muntjak* (right, Mm), **c** *B. taurus* (left, Bt) and *M. reevesi* (right, Mr), and **d** *M. reevesi* (left, Mr) and *M. muntjak* (right, Mm). **e** Dot plot of runs of collinearity containing at least 25 kb of aligned sequence between *M. reevesi* (left, MRE) and *M. muntjak* (top, MMU) visualized with last (v979)<sup>9</sup>.



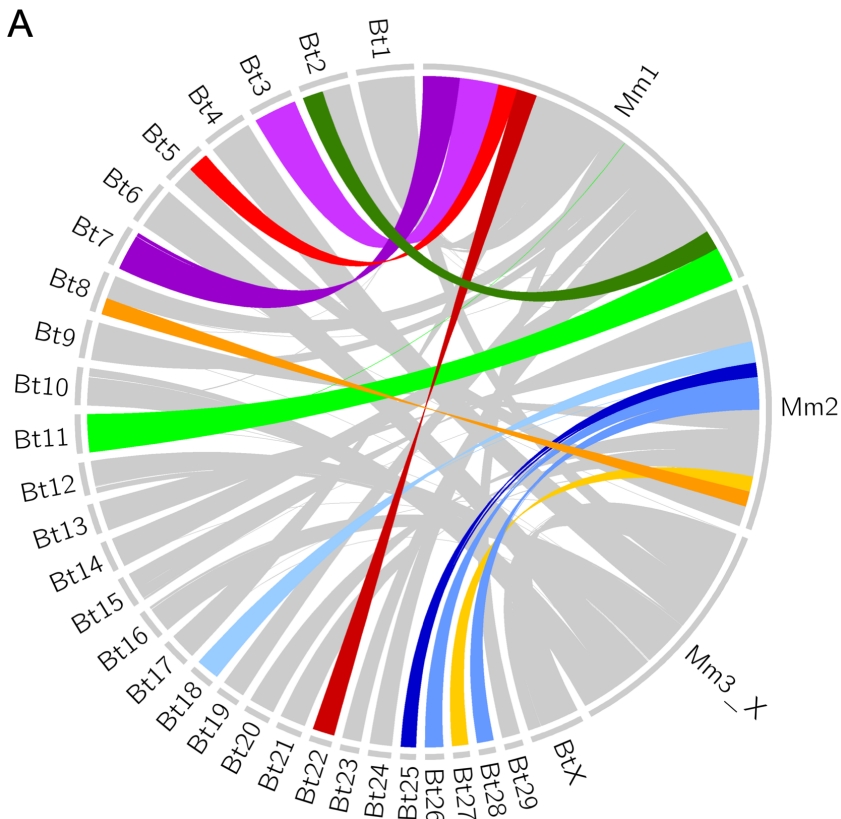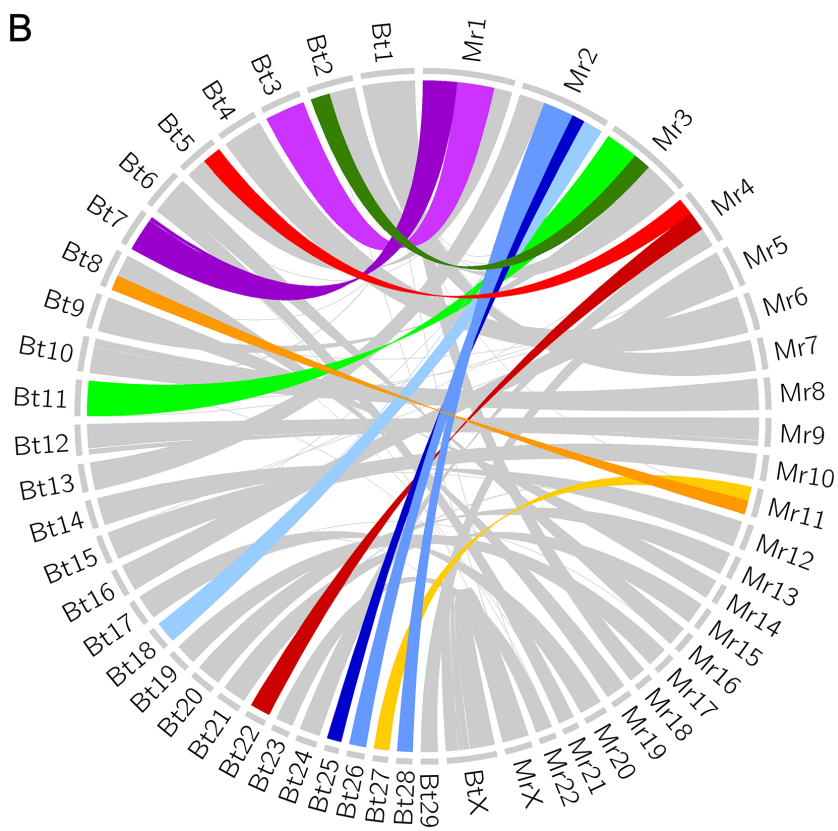

**Supplementary Figure 5. Circos plots highlighting fusions shared by *M. muntjak* and *M. reevesi*.** Circos (v0.69-6)<sup>8</sup> plots using runs of collinearity containing at least 25 kb of aligned sequence between **a** *B. taurus* (left, Bt) and *M. muntjak* (right, Mm) and **b** *B. taurus* (left, Bt) and *M. reevesi* (right, Mr) specifying the six shared muntjac fusions: BTA7/BTA3 (purple), BTA5prox/BTA22 (red), BTA2dist/BTA11 (green), BTA18/BTA25/BTA26\_28 (blue), and BTA27/BTA8dist (orange).

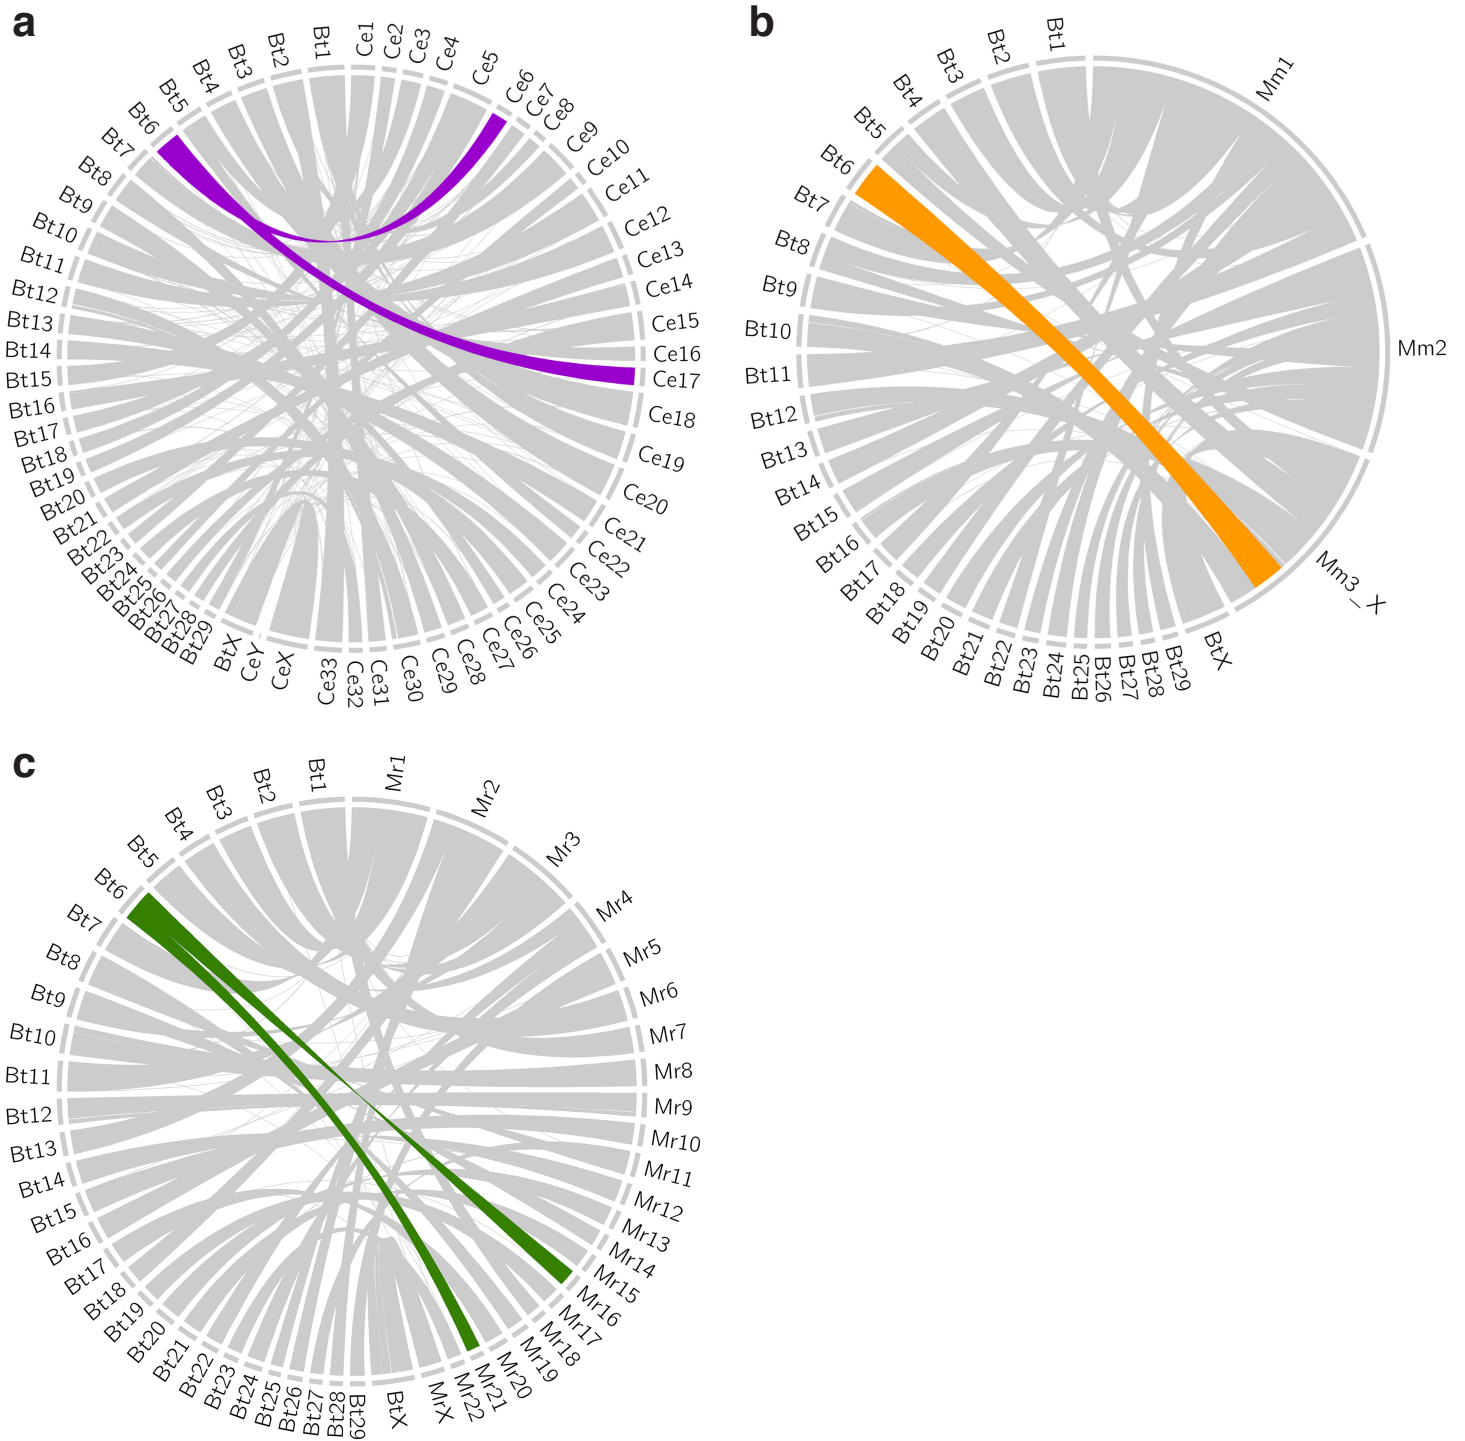

**Supplementary Figure 6. Circos plots highlighting fissions in the cervid lineage corresponding to cow chromosome six.** Circos (v0.69-6)<sup>8</sup> plots using runs of collinearity containing at least 25 kb of aligned sequence between **a** *B. taurus* (left, Bt) and *C. elaphus* (right, Ce) with the fission of BTA6 in purple; **b** *B. taurus* (left, Bt) and *M. muntjak* (right, Mm) with the fission-fusion reversal of BTA6 in orange; and **c** *B. taurus* (left, Bt) and *M. reevesi* (right, Mr) with the fission of BTA6 in green.

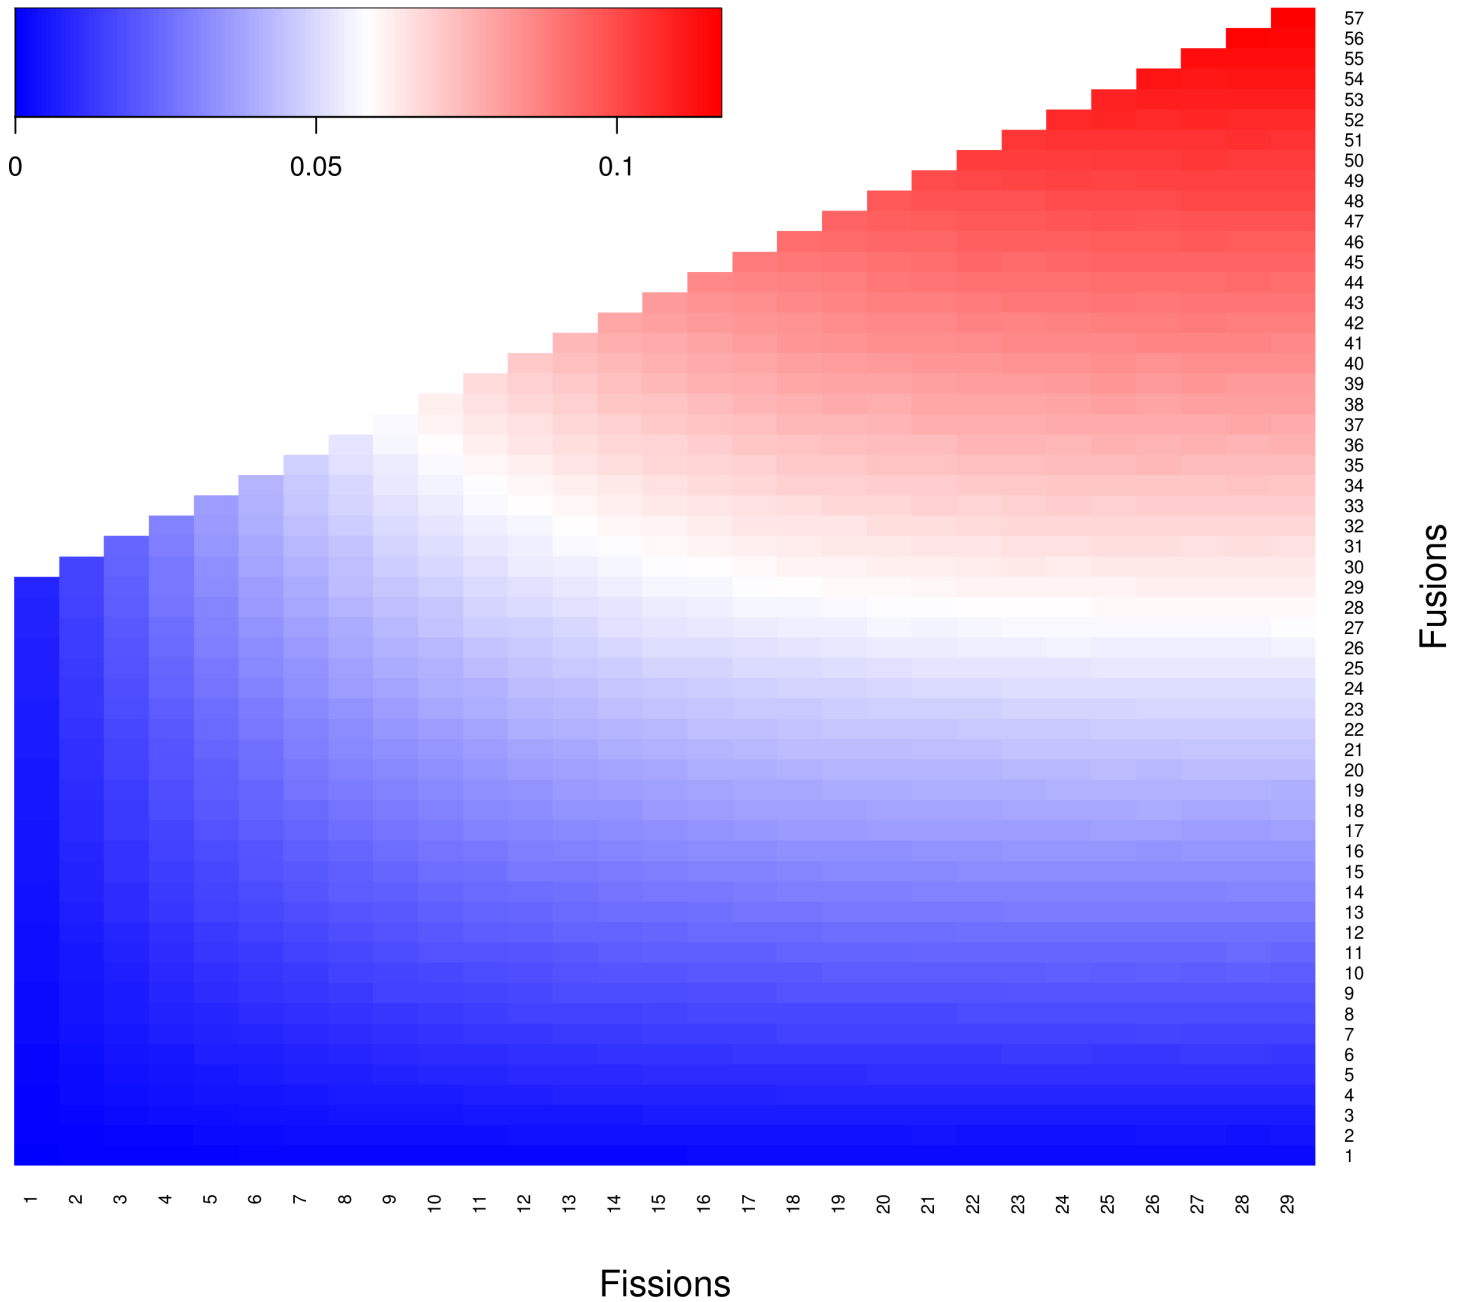

**Supplementary Figure 7. Chromosome fission-fusion reversal simulation.** Heatmap of probabilities where at least one fusion reverses a prior fission modeled to 1 million iterations for each possible scenario from a starting karyotype of  $n=29$ , using custom script `run_fission_fusion.sh` (v1.0).

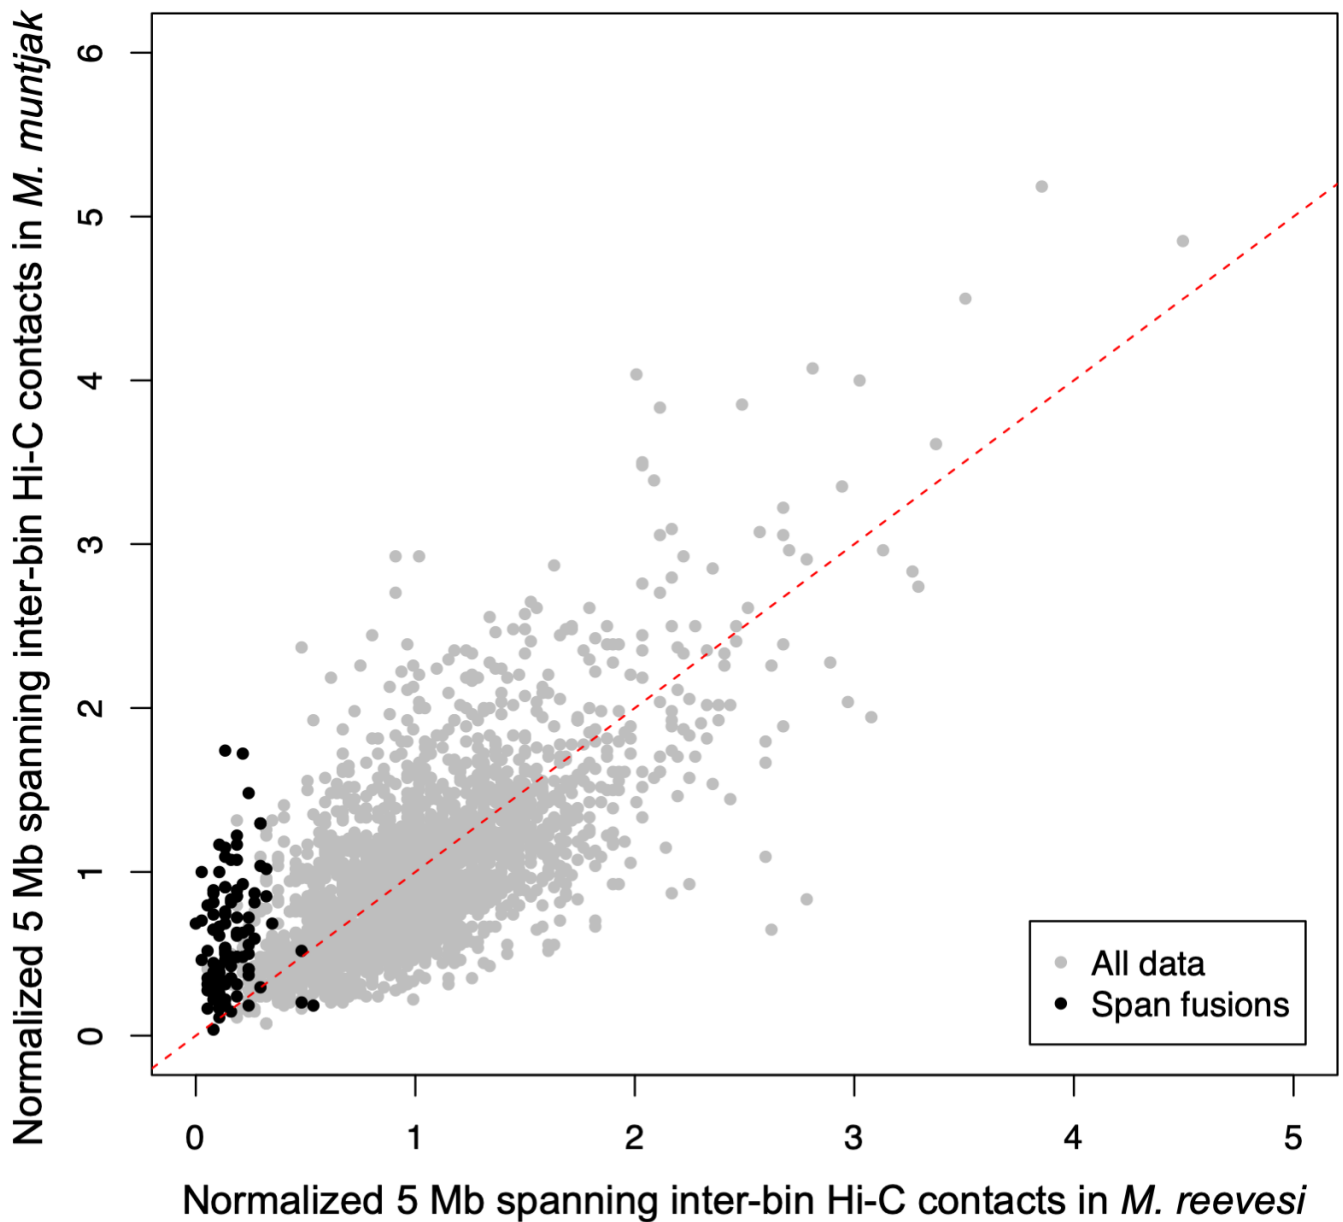

**Supplementary Figure 8. Chromatin contacts boundaries not maintained at fusion sites after chromosome fusion events.** Normalized 1 Mb inter-bin Hi-C contacts between bins 5 Mb apart for *M. muntjak* (y axis) vs. *M. reevesi* (x axis) with the inter-bin contacts that span across, but do not include, the *M. muntjak* lineage-specific fusion sites (see **Supplementary Table 7**) colored black. The expected result of conserved Hi-C contacts is represented with a dashed red line.

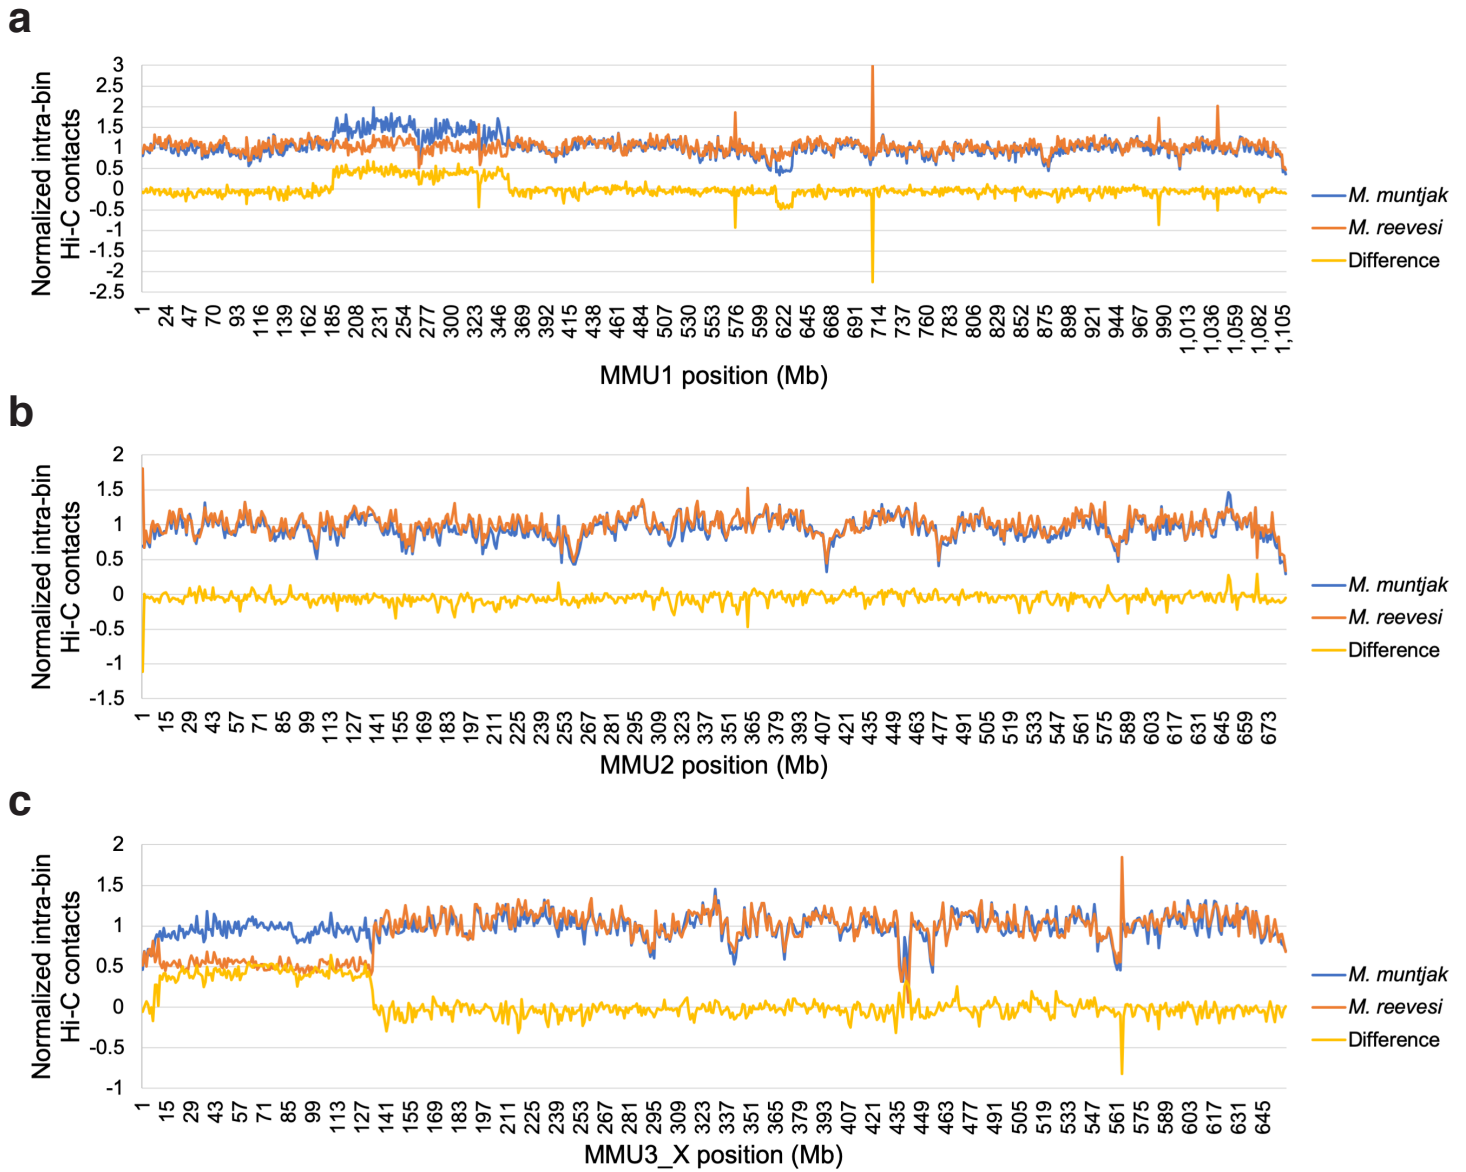

**Supplementary Figure 9. Copy number differences between *M. muntjak* and *M. reevesi*.** Using a bin size of 1 Mb and the *M. muntjak* assembly as the reference, normalized intra-bin Hi-C contacts for *M. muntjak* (blue) and *M. reevesi* (orange) at each position on **a** MMU1, **b** MMU2, and **c** MMU3\_X. The difference of *M. muntjak* contacts minus *M. reevesi* contacts is displayed in yellow.

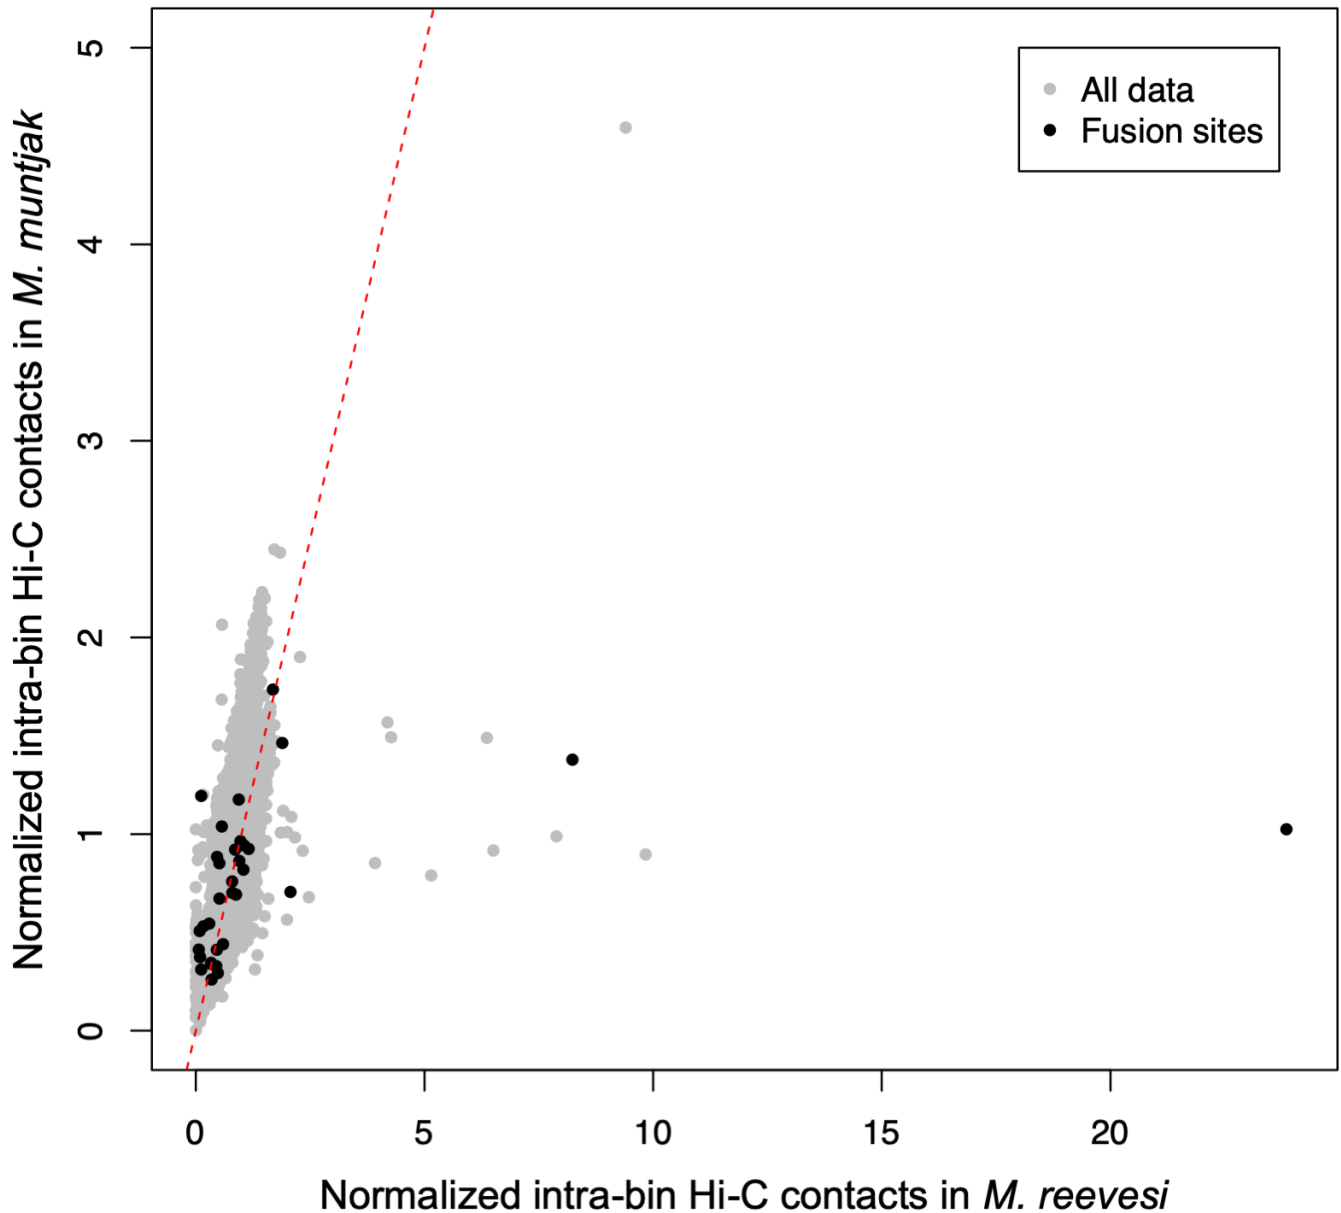

**Supplementary Figure 10. Chromatin contacts conserved within syntenic boundaries after chromosome fusion events.** Normalized 100 kb intra-bin Hi-C contacts for *M. muntjak* (y axis) vs. *M. reevesi* (x axis) with bins containing the *M. muntjak* lineage-specific fusion sites (see **Table S7**) colored black. The expected result of conserved Hi-C contacts is represented with a dashed red line. For fusion site ranges spanning two bins, the bin containing the majority of the fusion site range was deemed to be the fusion site bin. For fusion site ranges spanning three or more bins, the middle 100 kb bin(s) was deemed to be the fusion site bin(s).

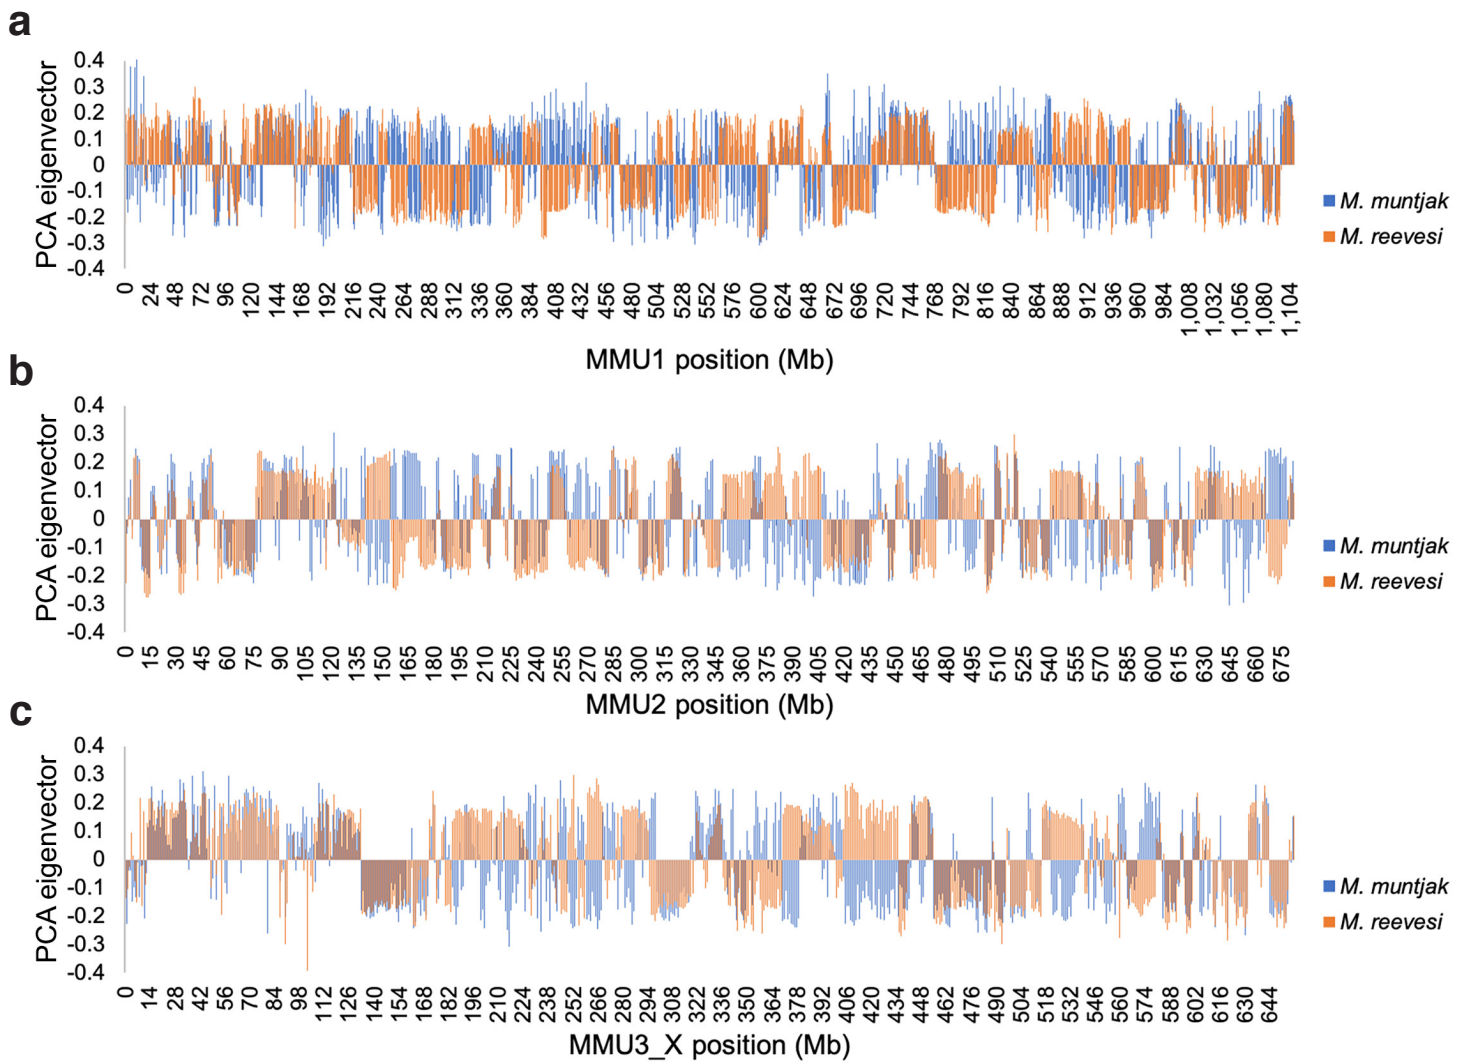

**Supplementary Figure 11. Chromatin A/B compartment conservation and change.** Identification of A/B compartment boundaries for *M. muntjak* (blue) and *M. reevesi* (orange) on the *M. muntjak* assembly using localized principal component analysis (PCA) eigenvectors calculated by call-compartments.R (<https://bitbucket.org/bredeson/artisanal>). **a** MMU1, **b** MMU2, **c** MMU3\_X.

**Supplementary Table 1. Summary of the muntjac genome assemblies.** Statistics were calculated using assembly-stats (commit 506a640; <https://github.com/sanger-pathogens/assembly-stats>).

| <b>Genomic feature</b>              | <b><i>M. muntjak</i></b> | <b><i>M. reevesi</i></b> |
|-------------------------------------|--------------------------|--------------------------|
| Total scaffold length, bp           | 2,573,529,099            | 2,579,575,442            |
| Number of scaffolds                 | 25,651                   | 29,705                   |
| Scaffold N50 length, bp             | 682,452,208              | 94,101,870               |
| Total contig length, bp             | 2,518,738,577            | 2,514,747,046            |
| Number of contigs                   | 49,270                   | 53,090                   |
| Contig N50 length, bp               | 215,534                  | 225,142                  |
| Contigs sequence in chromosomes, %  | 95.06                    | 92.93                    |
| Contig GC content, %                | 41.59                    | 41.59                    |
| Masked contig repeat sequence, %    | 40.33                    | 40.06                    |
| Number of genes                     | 25,737                   | 26,044                   |
| Genes with functional annotation, % | 98.11                    | 98.15                    |
| Average number of exons per gene    | 7.83                     | 7.77                     |
| Median predicted peptide length, aa | 328                      | 326                      |
| Median exon size, bp                | 124                      | 124                      |
| Median intron size, bp              | 921                      | 911                      |



**Supplementary Table 2. DNA sequencing generated for genome assembly. Excludes index reads.**

| <b>Species</b>                                      | <b>Library type</b>                                       | <b>Total number of reads</b> | <b>Total bases sequenced</b>      |
|-----------------------------------------------------|-----------------------------------------------------------|------------------------------|-----------------------------------|
| <i>M. muntjak</i><br>NCBI BioProject<br>PRJNA542135 | 10x Genomics Chromium<br>Genome<br>Dovetail Genomics Hi-C | 768,921,264<br>521,749,568   | 115,338,189,600<br>78,784,184,768 |
| <i>M. reevesi</i><br>NCBI BioProject<br>PRJNA542137 | 10x Genomics Chromium<br>Genome<br>Dovetail Genomics Hi-C | 696,864,964<br>530,002,086   | 104,529,744,600<br>80,030,314,986 |

**Supplementary Table 3. Pairwise nucleotide divergence in substitutions per site at fourfold degenerate sites.**  
Extracted from the RAxML (v8.2.11)<sup>10</sup> phylogenetic tree for the examined species using Newick utilities (v1.6)<sup>11</sup>.

| <b>Species</b>     | <b><i>B. taurus</i></b> | <b><i>C. elaphus</i></b> | <b><i>M. muntjak</i></b> | <b><i>M. reevesi</i></b> |
|--------------------|-------------------------|--------------------------|--------------------------|--------------------------|
| <i>C. elaphus</i>  | 0.0550                  | –                        | –                        | –                        |
| <i>M. muntjak</i>  | 0.0606                  | 0.0267                   | –                        | –                        |
| <i>M. reevesi</i>  | 0.0599                  | 0.0259                   | 0.0130                   | –                        |
| <i>R. tarandus</i> | 0.0592                  | 0.0298                   | 0.0355                   | 0.0347                   |

**Supplementary Table 4. Locations of the six cervid-specific fissions relative to the *B. taurus* genome assembly.**

| <i>B. taurus</i> chromosome | Using runs of collinearity from <i>C. elaphus</i> | Using runs of collinearity from <i>M. muntjak</i> | Using runs of collinearity from <i>M. reevesi</i> |
|-----------------------------|---------------------------------------------------|---------------------------------------------------|---------------------------------------------------|
| BTA1                        | 58,941,477 – 58,978,602                           | 57,645,593 – 57,778,258                           | 57,645,547 – 57,746,127                           |
| BTA2                        | 93,282,776 – 93,424,724                           | 79,668,309 – 79,719,766                           | 79,668,935 – 79,719,765                           |
| BTA5                        | 70,623,938 – 70,699,763                           | 57,880,818 – 58,822,584                           | 57,880,818 – 60,196,482                           |
| BTA6                        | 63,301,740 – 63,370,450                           | Fusion reversal                                   | 68,435,554 – 68,455,313                           |
| BTA8                        | 64,071,291 – 64,114,095                           | 67,266,180 – 67,499,444                           | 67,369,805 – 67,497,566                           |
| BTA9                        | 63,670,677 – 64,013,115                           | 64,824,832 – 65,087,945                           | 64,824,832 – 65,087,945                           |

**Supplementary Table 5. Muntjac chromosome fusions.** Locations of the shared fusion events in the *M. muntjak* and *M. reevesi* genome assemblies using runs of collinearity from *B. taurus*.

| <i>B. taurus</i> fused chromosomes   | <i>M. muntjak</i> region            | <i>M. reevesi</i> region        |
|--------------------------------------|-------------------------------------|---------------------------------|
| BTA7/BTA3                            | MMU1: 103,142,901 – 103,201,151     | MRE1: 103,650,999 – 103,852,521 |
| BTA5prox/BTA22                       | MMU1: 267,859,762 – 267,926,350     | MRE4: 52,627,734 – 52,781,577   |
| BTA2dist/BTA11                       | MMU1: 1,006,153,244 – 1,006,638,886 | MRE3: 100,711,306 – 101,302,993 |
| BTA18/BTA25                          | MMU2: 216,351,804 – 216,390,051     | MRE2: 210,159,178 – 210,200,937 |
| BTA25/BTA26                          | MMU2: 256,956,082 – 257,281,016     | MRE2: 169,793,458 – 170,063,149 |
| BTA26_28 ( <i>B. taurus</i> fission) | MMU2: 305,072,202 – 305,072,202     | MRE2: 121,918,267 – 122,082,397 |
| BTA27/BTA8dist                       | MMU2: 580,274,743 – 582,942,905     | MRE11: 40,769,993 – 43,560,918  |

**Supplementary Table 6. *M. reevesi* fusion junctions.** Locations of the six unique fusion events in the *M. reevesi* genome assembly were derived from one-to-one orthologs between *M. muntjak* and *M. reevesi* and then refined using runs of collinearity from *B. taurus* and *M. muntjak* against *M. reevesi*.

| <b><i>B. taurus</i> fused chromosomes</b> | <b><i>M. reevesi</i> chromosome</b> | <b><i>M. reevesi</i> start</b> | <b><i>M. reevesi</i> end</b> |
|-------------------------------------------|-------------------------------------|--------------------------------|------------------------------|
| BTA7_3/BTA5dist                           | MRE1                                | 216,558,007                    | 216,594,231                  |
| BTA18_25_26_28/BTA13                      | MRE2                                | 78,441,940                     | 78,562,328                   |
| BTA2prox/BTA9dist                         | MRE3                                | 154,290,838                    | 154,298,872                  |
| BTA9dist/BTA2dist_11                      | MRE3                                | 191,988,183                    | 192,099,419                  |
| BTA5prox_22/BTA24                         | MRE4                                | 111,704,918                    | 111,709,617                  |
| BTA29/BTA16                               | MRE5                                | 47,104,391                     | 47,224,935                   |

**Supplementary Table 7. *M. muntjak* fusion junctions.** Locations of the 26 unique fusion events in the *M. muntjak* genome assembly were derived from one-to-one orthologs between *M. muntjak* and *M. reevesi* and then refined using runs of collinearity from *B. taurus* and *M. reevesi* against *M. muntjak*.

| <i>B. taurus</i> fused chromosomes | <i>M. muntjak</i> chromosome | <i>M. muntjak</i> start | <i>M. muntjak</i> end |
|------------------------------------|------------------------------|-------------------------|-----------------------|
| BTA7_3/BTA5prox_22                 | MMU1                         | 215,667,096             | 215,740,550           |
| BTA5prox_22/BTA17                  | MMU1                         | 326,596,489             | 326,664,606           |
| BTA17/BTA2prox                     | MMU1                         | 394,376,597             | 394,423,120           |
| BTA2prox/BTA1dist                  | MMU1                         | 468,279,958             | 468,421,169           |
| BTA1dist/BTA29                     | MMU1                         | 562,054,424             | 562,154,407           |
| BTA29/ BTA8prox                    | MMU1                         | 609,147,303             | 609,442,186           |
| BTA8prox/BTA9dist                  | MMU1                         | 669,798,392             | 669,917,570           |
| BTA9dist/BTA19                     | MMU1                         | 707,332,274             | 707,411,696           |
| BTA19/BTA24                        | MMU1                         | 767,481,614             | 767,858,594           |
| BTA24/BTA23                        | MMU1                         | 825,563,679             | 825,664,460           |
| BTA23/BTA14                        | MMU1                         | 875,352,976             | 875,473,556           |
| BTA14/BTA2dist_11                  | MMU1                         | 952,277,739             | 952,439,995           |
| BTA15/BTA13                        | MMU2                         | 76,554,689              | 76,587,068            |
| BTA13/BTA18_25_26_28               | MMU2                         | 155,096,035             | 155,468,627           |
| BTA18_25_26_28/BTA9prox            | MMU2                         | 348,208,540             | 348,522,144           |
| BTA9prox/BTA20                     | MMU2                         | 407,305,863             | 407,476,405           |
| BTA20/BTA21                        | MMU2                         | 474,891,789             | 475,146,554           |
| BTA21/BTA27_8dist                  | MMU2                         | 540,052,390             | 540,055,842           |
| BTA27_8dist/BTA5dist               | MMU2                         | 624,503,504             | 624,522,918           |
| BTAX/BTA1prox                      | MMU3_X                       | 133,000,163             | 133,001,250           |
| BTA1prox/BTA4                      | MMU3_X                       | 184,069,851             | 184,122,591           |
| BTA4/BTA16                         | MMU3_X                       | 295,103,485             | 295,251,858           |
| BTA16/BTA12                        | MMU3_X                       | 370,301,578             | 370,307,164           |
| BTA12/BTA6prox                     | MMU3_X                       | 454,989,747             | 454,992,643           |
| BTA6prox/BTA6dist                  | MMU3_X                       | 516,012,504             | 516,138,154           |
| BTA6dist/BTA10                     | MMU3_X                       | 562,995,659             | 563,046,092           |

**Supplementary Table 8. Estimated divergence times within cervids and between Bovidae and Cervidae.**

Estimated divergence times in million years were calculated with MEGA7 (v7.0.26)<sup>12</sup> and compared with published sources. TimeTree data was retrieved on December 15, 2019<sup>13</sup>. Times from Toljagić et al.<sup>14</sup> and Zurano et al.<sup>15</sup> were derived from mitochondrial sequences, whereas times from Chen et al.<sup>16</sup> were from the alignment of nuclear genomes.

| <b>Node</b>                                            | <b>This work</b> | <b>TimeTree<br/>estimated<br/>times<sup>13</sup></b> | <b>TimeTree<br/>confidence<br/>intervals<sup>13</sup></b> | <b>Toljagić<br/>et al.<sup>14</sup></b> | <b>Zurano<br/>et al.<br/>(dataset1)<sup>15</sup></b> | <b>Chen<br/>et al.<sup>16</sup></b> |
|--------------------------------------------------------|------------------|------------------------------------------------------|-----------------------------------------------------------|-----------------------------------------|------------------------------------------------------|-------------------------------------|
| <i>M. muntjak</i> – <i>M. reevesi</i>                  | 4.9              | 4.7                                                  | 2.9 – 6.5                                                 | 4.1                                     | 4.2                                                  | 3.2                                 |
| <i>Muntiacus</i> – <i>Cervus</i>                       | 11.8             | 13.6                                                 | 8.6 – 14.4                                                | 11.4                                    | 10.9                                                 | 9.1                                 |
| ( <i>Muntiacus</i> , <i>Cervus</i> ) – <i>Rangifer</i> | 13.6             | 13.6                                                 | 10.6 – 16.6                                               | 14.2                                    | 13.5                                                 | 10.6                                |
| Bovidae – Cervidae                                     | 22.8             | 27.3                                                 | 23.4 – 28.7                                               | 22.7                                    | 22.0                                                 | 20.3                                |

## Supplementary References

1. Zimin, A. V. et al. A whole-genome assembly of the domestic cow, *Bos taurus*. *Genome Biol.* **10**, R42 (2009).
2. Cunningham, F. et al. Ensembl 2019. *Nucleic Acids Res.* **47**, D745–D751 (2019).
3. Bana, N. Á. et al. The red deer *Cervus elaphus* genome CerEla1.0: sequencing, annotating, genes, and chromosomes. *Mol. Genet. Genomics* **293**, 665–684 (2018).
4. Li, Z. et al. Draft genome of the reindeer (*Rangifer tarandus*). *Gigascience* **6**, 1–5 (2017).
5. Li, Z. et al. Draft genomic data of the reindeer (*Rangifer tarandus*). *GigaScience Database*. <https://doi.org/10.5524/100370> (2017).
6. Wang, Y., Coleman-Derr, D., Chen, G. & Gu, Y. Q. OrthoVenn: a web server for genome wide comparison and annotation of orthologous clusters across multiple species. *Nucleic Acids Res.* **43**, W78–W84 (2015).
7. Xu, L. et al. OrthoVenn2: a web server for whole-genome comparison and annotation of orthologous clusters across multiple species. *Nucleic Acids Res.* **47**, W52–W58 (2019).
8. Krzywinski, M. et al. Circos: an information aesthetic for comparative genomics. *Genome Res.* **19**, 1639–1645 (2009).
9. Kielbasa, S. M., Wan, R., Sato, K., Horton, P. & Frith, M. C. Adaptive seeds tame genomic sequence comparison. *Genome Res.* **21**, 487–493 (2011).
10. Stamatakis, A. RAxML version 8: a tool for phylogenetic analysis and post-analysis of large phylogenies. *Bioinformatics* **30**, 1312–1313 (2014).
11. Junier, T. & Zdobnov, E. M. The Newick utilities: high-throughput phylogenetic tree processing in the UNIX shell. *Bioinformatics* **26**, 1669–1670 (2010).
12. Kumar, S., Stecher, G. & Tamura, K. MEGA7: Molecular Evolutionary Genetics Analysis version 7.0 for bigger datasets. *Mol. Biol. Evol.* **33**, 1870–1874 (2016).
13. Kumar, S., Stecher, G., Suleski, M. & Hedges, S. B. TimeTree: a resource for timelines, timetrees, and divergence times. *Mol. Biol. Evol.* **34**, 1812–1819 (2017).
14. Toljagić, O., Voje, K. L., Matschiner, M., Liow, L. H. & Hansen, T. F. Millions of years behind: slow adaptation of ruminants to grasslands. *Syst. Biol.* **67**, 145–157 (2018).
15. Zurano, J. P. et al. Cetartiodactyla: updating a time-calibrated molecular phylogeny. *Mol. Phylogenet. Evol.* **133**, 256–262 (2019).
16. Chen, L. et al. Large-scale ruminant genome sequencing provides insights into their evolution and distinct traits. *Science* **364**, eaav6202 (2019).
17. Nielsen, R. & Yang, Z. Likelihood models for detecting positively selected amino acid sites and applications to the HIV-1 envelope gene. *Genetics* **148**, 929–936 (1998).
18. Camacho, C. et al. BLAST+: architecture and applications. *BMC Bioinform.* **10**, 421 (2009).
19. The UniProt Consortium. UniProt: the universal protein knowledgebase. *Nucleic Acids Res.* **45**, D158–D169 (2017).
